# Supplementary material
Source: publisher figshare collection journal article supplement (https://acs.figshare.com/ndownloader/files/4913389)
Supplement: Supplementary file 1 [file 4913389]

data_Elias

# SUBMISSION DETAILS 

# 1. SUBMISSION DETAILS

_publ_contact_author_name   'Prof.Anil J. Elias'
_publ_author_name 'Prof.Anil J. Elias'
_publ_contact_author_address     
;DEPARTMENT OF CHEMISTRY
INDIAN INSTITUTE OF TECHNOLOGY DELHI
HAUZ KHAS, NEW DELHI 110016
INDIA
;
_publ_author_address      
;DEPARTMENT OF CHEMISTRY
INDIAN INSTITUTE OF TECHNOLOGY DELHI
HAUZ KHAS, NEW DELHI 110016
INDIA
;
_publ_contact_author_email       elias@chemistry.iitd.ac.in
_publ_contact_author_phone       +91-11-26591504
_publ_contact_author_fax         +91-11-26581504
_publ_author_email               debmayukh285@gmail.com 
_publ_requested_journal          'Organometallics'

_publ_section_abstract
; 
;
_publ_section_title
;

;

## Crystallographic Data of 4a 
  
data_4a 
  
_audit_creation_method            SHELXL-97 
_chemical_name_systematic 
; 
 ? 
; 
_chemical_name_common             ? 
_chemical_melting_point           ? 
_chemical_formula_moiety          
 'C24 H23 Cu Fe I N O' 
_chemical_formula_sum 
 'C24 H23 Cu Fe I N O' 
_chemical_formula_weight          587.73 
  
loop_ 
 _atom_type_symbol 
 _atom_type_description 
 _atom_type_scat_dispersion_real 
 _atom_type_scat_dispersion_imag 
 _atom_type_scat_source 
 'C'  'C'   0.0033   0.0016 
 'International Tables Vol C Tables 4.2.6.8 and 6.1.1.4' 
 'H'  'H'   0.0000   0.0000 
 'International Tables Vol C Tables 4.2.6.8 and 6.1.1.4' 
 'N'  'N'   0.0061   0.0033 
 'International Tables Vol C Tables 4.2.6.8 and 6.1.1.4' 
 'O'  'O'   0.0106   0.0060 
 'International Tables Vol C Tables 4.2.6.8 and 6.1.1.4' 
 'Fe'  'Fe'   0.3463   0.8444 
 'International Tables Vol C Tables 4.2.6.8 and 6.1.1.4' 
 'Cu'  'Cu'   0.3201   1.2651 
 'International Tables Vol C Tables 4.2.6.8 and 6.1.1.4' 
 'I'  'I'  -0.4742   1.8119 
 'International Tables Vol C Tables 4.2.6.8 and 6.1.1.4' 
  
_symmetry_cell_setting            Orthorhombic 
_symmetry_space_group_name_H-M    P212121 
_symmetry_space_group_name_Hall   P2ac2ab  
  
loop_ 
 _symmetry_equiv_pos_as_xyz 
 'x, y, z' 
 '-x+1/2, -y, z+1/2' 
 '-x, y+1/2, -z+1/2' 
 'x+1/2, -y+1/2, -z' 
  
_cell_length_a                    9.2310(13) 
_cell_length_b                    13.687(2) 
_cell_length_c                    17.612(3) 
_cell_angle_alpha                 90.00 
_cell_angle_beta                  90.00 
_cell_angle_gamma                 90.00 
_cell_volume                      2225.2(6) 
_cell_formula_units_Z             4 
_cell_measurement_temperature     298(2) 
_cell_measurement_reflns_used     4859 
_cell_measurement_theta_min       2.31 
_cell_measurement_theta_max       23.90 
  
_exptl_crystal_description        block 
_exptl_crystal_colour             red 
_exptl_crystal_size_max           0.197 
_exptl_crystal_size_mid           0.158 
_exptl_crystal_size_min           0.128 
_exptl_crystal_density_meas       ? 
_exptl_crystal_density_diffrn     1.754 
_exptl_crystal_density_method     'not measured' 
_exptl_crystal_F_000              1160.0 
_exptl_absorpt_coefficient_mu     3.010 
_exptl_absorpt_correction_type    multi-scan 
_exptl_absorpt_correction_T_min   0.571 
_exptl_absorpt_correction_T_max   0.680 
_exptl_absorpt_process_details    '(SADABS; Bruker, 2000)' 
  
_exptl_special_details 
; 
 ? 
; 
  
_diffrn_ambient_temperature       298(2) 
_diffrn_radiation_wavelength      0.71073 
_diffrn_radiation_type            MoK\a 
_diffrn_radiation_source          'fine-focus sealed tube' 
_diffrn_radiation_monochromator   graphite 
_diffrn_measurement_device_type   'CCD area detector' 
_diffrn_measurement_method        'phi and omega scans' 
_diffrn_detector_area_resol_mean  ? 
_diffrn_standards_number          ? 
_diffrn_standards_interval_count  ? 
_diffrn_standards_interval_time   ? 
_diffrn_standards_decay_%         ? 
_diffrn_reflns_number             21468 
_diffrn_reflns_av_R_equivalents   0.0767 
_diffrn_reflns_av_sigmaI/netI     0.0468 
_diffrn_reflns_limit_h_min        -10 
_diffrn_reflns_limit_h_max        10 
_diffrn_reflns_limit_k_min        -16 
_diffrn_reflns_limit_k_max        16 
_diffrn_reflns_limit_l_min        -20 
_diffrn_reflns_limit_l_max        20 
_diffrn_reflns_theta_min          1.88 
_diffrn_reflns_theta_max          24.99 
_reflns_number_total              3917 
_reflns_number_gt                 3759 
_reflns_threshold_expression      >2sigma(I) 
  
_computing_data_collection        'Bruker SMART' 
_computing_cell_refinement        'Bruker SMART' 
_computing_data_reduction         'Bruker SAINT' 
_computing_structure_solution     'SHELXS-97 (Sheldrick, 1990)' 
_computing_structure_refinement   'SHELXL-97 (Sheldrick, 1997)' 
_computing_molecular_graphics     'Bruker SHELXTL' 
_computing_publication_material   'Bruker SHELXTL' 
  
_refine_special_details 
; 
 Refinement of F^2^ against ALL reflections.  The weighted R-factor wR and 
 goodness of fit S are based on F^2^, conventional R-factors R are based 
 on F, with F set to zero for negative F^2^. The threshold expression of 
 F^2^ > 2sigma(F^2^) is used only for calculating R-factors(gt) etc. and is 
 not relevant to the choice of reflections for refinement.  R-factors based 
 on F^2^ are statistically about twice as large as those based on F, and R- 
 factors based on ALL data will be even larger. 
; 
  
_refine_ls_structure_factor_coef  Fsqd 
_refine_ls_matrix_type            full 
_refine_ls_weighting_scheme       calc 
_refine_ls_weighting_details 
 'calc w=1/[\s^2^(Fo^2^)+(0.0526P)^2^+0.0000P] where P=(Fo^2^+2Fc^2^)/3' 
_atom_sites_solution_primary      direct 
_atom_sites_solution_secondary    difmap 
_atom_sites_solution_hydrogens    geom 
_refine_ls_hydrogen_treatment     mixed 
_refine_ls_extinction_method      none 
_chemical_absolute_configuration syn
_refine_ls_extinction_coef        ? 
_refine_ls_abs_structure_details 
 'Flack H D (1983), Acta Cryst. A39, 876-881' 
_refine_ls_abs_structure_Flack    0.03(4) 
_refine_ls_number_reflns          3917 
_refine_ls_number_parameters      264 
_refine_ls_number_restraints      0 
_refine_ls_R_factor_all           0.0567 
_refine_ls_R_factor_gt            0.0536 
_refine_ls_wR_factor_ref          0.1135 
_refine_ls_wR_factor_gt           0.1121 
_refine_ls_goodness_of_fit_ref    1.293 
_refine_ls_restrained_S_all       1.293 
_refine_ls_shift/su_max           0.000 
_refine_ls_shift/su_mean          0.000 
  
loop_ 
 _atom_site_label 
 _atom_site_type_symbol 
 _atom_site_fract_x 
 _atom_site_fract_y 
 _atom_site_fract_z 
 _atom_site_U_iso_or_equiv 
 _atom_site_adp_type 
 _atom_site_occupancy 
 _atom_site_symmetry_multiplicity 
 _atom_site_calc_flag 
 _atom_site_refinement_flags 
 _atom_site_disorder_assembly 
 _atom_site_disorder_group 
O1 O -0.0780(6) 0.1407(4) 0.2338(3) 0.0387(13) Uani 1 1 d . . . 
N1 N 0.0617(7) 0.2496(4) 0.1746(3) 0.0308(14) Uani 1 1 d . . . 
I1 I 0.14899(6) 0.44263(4) 0.03110(3) 0.04341(18) Uani 1 1 d . . . 
Fe1 Fe 0.61708(11) 0.48302(8) 0.21839(7) 0.0309(3) Uani 1 1 d . . . 
Cu1 Cu 0.17117(10) 0.37152(6) 0.16227(5) 0.0292(2) Uani 1 1 d . . . 
C1 C 0.4020(8) 0.5183(6) 0.2268(5) 0.0334(17) Uani 1 1 d . . . 
C2 C 0.4593(7) 0.5501(6) 0.1545(4) 0.0312(16) Uani 1 1 d . . . 
H2 H 0.4254 0.5296 0.1042 0.037 Uiso 1 1 calc R . . 
C3 C 0.5722(8) 0.6164(6) 0.1696(5) 0.039(2) Uani 1 1 d . . . 
H3 H 0.6318 0.6490 0.1312 0.047 Uiso 1 1 calc R . . 
C4 C 0.5887(9) 0.6267(6) 0.2495(5) 0.038(2) Uani 1 1 d . . . 
H4 H 0.6605 0.6678 0.2752 0.045 Uiso 1 1 calc R . . 
C5 C 0.4868(8) 0.5663(6) 0.2853(5) 0.0343(17) Uani 1 1 d . . . 
H5 H 0.4737 0.5589 0.3402 0.041 Uiso 1 1 calc R . . 
C6 C 0.6432(11) 0.3413(5) 0.2486(6) 0.055(3) Uani 1 1 d . . . 
H6 H 0.5701 0.3005 0.2735 0.066 Uiso 1 1 calc R . . 
C7 C 0.6624(12) 0.3508(7) 0.1700(6) 0.059(3) Uani 1 1 d . . . 
H7 H 0.6052 0.3182 0.1305 0.071 Uiso 1 1 calc R . . 
C8 C 0.7797(10) 0.4160(8) 0.1577(7) 0.060(3) Uani 1 1 d . . . 
H8 H 0.8172 0.4370 0.1083 0.072 Uiso 1 1 calc R . . 
C9 C 0.8313(9) 0.4463(7) 0.2294(6) 0.055(2) Uani 1 1 d . . . 
H9 H 0.9114 0.4918 0.2385 0.066 Uiso 1 1 calc R . . 
C10 C 0.7484(11) 0.3984(7) 0.2858(6) 0.057(3) Uani 1 1 d . . . 
H10 H 0.7607 0.4048 0.3409 0.068 Uiso 1 1 calc R . . 
C11 C 0.2951(7) 0.4441(6) 0.2379(4) 0.0266(16) Uani 1 1 d . . . 
C12 C 0.2204(8) 0.3823(5) 0.2706(4) 0.0287(16) Uani 1 1 d . . . 
C13 C 0.1567(8) 0.3203(5) 0.3283(4) 0.0287(16) Uani 1 1 d . . . 
C14 C 0.1989(9) 0.3411(6) 0.4048(5) 0.040(2) Uani 1 1 d . . . 
H14 H 0.2634 0.3916 0.4152 0.048 Uiso 1 1 calc R . . 
C15 C 0.1434(12) 0.2860(7) 0.4620(5) 0.055(2) Uani 1 1 d . . . 
H15 H 0.1726 0.2982 0.5116 0.066 Uiso 1 1 calc R . . 
C16 C 0.0457(12) 0.2134(7) 0.4483(5) 0.056(3) Uani 1 1 d . . . 
H16 H 0.0080 0.1779 0.4888 0.067 Uiso 1 1 calc R . . 
C17 C 0.0023(9) 0.1920(6) 0.3756(5) 0.043(2) Uani 1 1 d . . . 
H17 H -0.0636 0.1417 0.3672 0.051 Uiso 1 1 calc R . . 
C18 C 0.0563(8) 0.2452(5) 0.3144(4) 0.0307(17) Uani 1 1 d . . . 
C19 C 0.0137(8) 0.2147(5) 0.2372(4) 0.0279(17) Uani 1 1 d . . . 
C20 C -0.1136(8) 0.1296(6) 0.1535(5) 0.041(2) Uani 1 1 d . . . 
H20A H -0.2065 0.1592 0.1419 0.049 Uiso 1 1 calc R . . 
H20B H -0.1164 0.0612 0.1391 0.049 Uiso 1 1 calc R . . 
C21 C 0.0082(8) 0.1825(5) 0.1130(4) 0.0321(18) Uani 1 1 d . . . 
H21 H -0.0288 0.2198 0.0697 0.038 Uiso 1 1 calc R . . 
C22 C 0.1345(9) 0.1149(6) 0.0886(4) 0.0368(18) Uani 1 1 d . . . 
H22 H 0.1677 0.0790 0.1335 0.044 Uiso 1 1 calc R . . 
C23 C 0.0835(11) 0.0408(7) 0.0298(6) 0.067(3) Uani 1 1 d . . . 
H23A H 0.0453 0.0746 -0.0136 0.101 Uiso 1 1 calc R . . 
H23B H 0.0093 0.0004 0.0515 0.101 Uiso 1 1 calc R . . 
H23C H 0.1636 0.0008 0.0144 0.101 Uiso 1 1 calc R . . 
C24 C 0.2624(9) 0.1721(7) 0.0569(5) 0.048(2) Uani 1 1 d . . . 
H24A H 0.3366 0.1274 0.0410 0.073 Uiso 1 1 calc R . . 
H24B H 0.3001 0.2146 0.0955 0.073 Uiso 1 1 calc R . . 
H24C H 0.2311 0.2103 0.0143 0.073 Uiso 1 1 calc R . . 
  
loop_ 
 _atom_site_aniso_label 
 _atom_site_aniso_U_11 
 _atom_site_aniso_U_22 
 _atom_site_aniso_U_33 
 _atom_site_aniso_U_23 
 _atom_site_aniso_U_13 
 _atom_site_aniso_U_12 
O1 0.039(3) 0.037(3) 0.040(3) 0.004(3) 0.003(2) -0.017(3) 
N1 0.029(3) 0.027(3) 0.036(4) 0.005(3) 0.000(3) -0.005(3) 
I1 0.0417(3) 0.0518(3) 0.0366(3) 0.0112(3) -0.0036(2) -0.0114(3) 
Fe1 0.0217(5) 0.0261(5) 0.0448(6) -0.0037(5) 0.0014(5) -0.0014(4) 
Cu1 0.0268(5) 0.0280(5) 0.0327(5) 0.0002(4) 0.0015(4) -0.0068(4) 
C1 0.024(4) 0.031(4) 0.045(5) -0.008(4) -0.004(3) 0.007(3) 
C2 0.030(4) 0.033(4) 0.031(4) 0.012(3) -0.003(3) -0.003(3) 
C3 0.029(4) 0.032(4) 0.056(5) 0.020(4) 0.001(4) -0.002(3) 
C4 0.031(4) 0.021(4) 0.061(6) -0.003(4) -0.001(4) -0.001(3) 
C5 0.025(4) 0.036(4) 0.042(4) -0.015(4) 0.006(3) 0.001(3) 
C6 0.043(5) 0.016(4) 0.106(8) 0.003(4) -0.010(6) 0.007(4) 
C7 0.066(7) 0.045(5) 0.066(7) -0.021(5) -0.022(6) 0.025(5) 
C8 0.040(5) 0.068(7) 0.072(7) -0.014(6) 0.008(5) 0.013(5) 
C9 0.027(4) 0.046(5) 0.093(7) -0.013(5) -0.017(5) 0.009(4) 
C10 0.058(6) 0.048(6) 0.064(6) 0.010(5) -0.020(5) 0.027(5) 
C11 0.023(4) 0.028(4) 0.029(4) -0.008(3) -0.006(3) 0.003(3) 
C12 0.031(4) 0.032(4) 0.023(4) -0.007(3) -0.003(3) 0.002(3) 
C13 0.029(4) 0.027(4) 0.029(4) -0.007(3) 0.003(4) 0.005(3) 
C14 0.047(5) 0.034(4) 0.040(5) -0.001(4) -0.005(4) 0.003(4) 
C15 0.078(7) 0.050(5) 0.036(5) 0.001(4) 0.005(6) -0.002(5) 
C16 0.074(7) 0.058(6) 0.035(5) 0.011(4) 0.021(5) -0.019(5) 
C17 0.048(5) 0.038(5) 0.042(5) 0.001(4) 0.014(4) -0.014(4) 
C18 0.031(4) 0.026(4) 0.036(4) 0.000(3) 0.005(3) 0.004(3) 
C19 0.024(4) 0.022(4) 0.037(5) 0.007(3) 0.002(3) -0.003(3) 
C20 0.034(4) 0.038(4) 0.052(5) -0.006(4) 0.002(4) -0.012(4) 
C21 0.035(4) 0.026(4) 0.034(4) -0.002(3) -0.010(3) -0.006(3) 
C22 0.037(4) 0.033(4) 0.040(4) -0.008(3) -0.003(4) 0.000(4) 
C23 0.063(6) 0.061(7) 0.077(7) -0.031(6) 0.006(6) -0.010(5) 
C24 0.035(5) 0.068(6) 0.043(5) -0.007(5) 0.006(4) 0.001(5) 
  
_geom_special_details 
; 
 All esds (except the esd in the dihedral angle between two l.s. planes) 
 are estimated using the full covariance matrix.  The cell esds are taken 
 into account individually in the estimation of esds in distances, angles 
 and torsion angles; correlations between esds in cell parameters are only 
 used when they are defined by crystal symmetry.  An approximate (isotropic) 
 treatment of cell esds is used for estimating esds involving l.s. planes. 
; 
  
loop_ 
 _geom_bond_atom_site_label_1 
 _geom_bond_atom_site_label_2 
 _geom_bond_distance 
 _geom_bond_site_symmetry_2 
 _geom_bond_publ_flag 
O1 C19 1.322(9) . ? 
O1 C20 1.461(10) . ? 
N1 C19 1.281(9) . ? 
N1 C21 1.505(9) . ? 
N1 Cu1 1.963(6) . ? 
I1 Cu1 2.5151(11) . ? 
Fe1 C6 2.025(8) . ? 
Fe1 C5 2.033(7) . ? 
Fe1 C7 2.043(9) . ? 
Fe1 C1 2.049(7) . ? 
Fe1 C9 2.050(8) . ? 
Fe1 C10 2.055(8) . ? 
Fe1 C2 2.056(7) . ? 
Fe1 C8 2.058(9) . ? 
Fe1 C4 2.058(8) . ? 
Fe1 C3 2.060(8) . ? 
Cu1 C12 1.966(7) . ? 
Cu1 C11 2.017(7) . ? 
C1 C11 1.430(10) . ? 
C1 C2 1.446(11) . ? 
C1 C5 1.451(11) . ? 
C2 C3 1.408(11) . ? 
C2 H2 0.9800 . ? 
C3 C4 1.422(12) . ? 
C3 H3 0.9800 . ? 
C4 C5 1.401(11) . ? 
C4 H4 0.9800 . ? 
C5 H5 0.9800 . ? 
C6 C7 1.401(14) . ? 
C6 C10 1.409(13) . ? 
C6 H6 0.9800 . ? 
C7 C8 1.419(14) . ? 
C7 H7 0.9800 . ? 
C8 C9 1.412(14) . ? 
C8 H8 0.9800 . ? 
C9 C10 1.415(14) . ? 
C9 H9 0.9800 . ? 
C10 H10 0.9800 . ? 
C11 C12 1.233(10) . ? 
C12 C13 1.450(10) . ? 
C13 C18 1.406(10) . ? 
C13 C14 1.430(11) . ? 
C14 C15 1.359(12) . ? 
C14 H14 0.9300 . ? 
C15 C16 1.363(13) . ? 
C15 H15 0.9300 . ? 
C16 C17 1.373(12) . ? 
C16 H16 0.9300 . ? 
C17 C18 1.394(10) . ? 
C17 H17 0.9300 . ? 
C18 C19 1.475(10) . ? 
C20 C21 1.515(11) . ? 
C20 H20A 0.9700 . ? 
C20 H20B 0.9700 . ? 
C21 C22 1.549(11) . ? 
C21 H21 0.9800 . ? 
C22 C24 1.522(12) . ? 
C22 C23 1.524(11) . ? 
C22 H22 0.9800 . ? 
C23 H23A 0.9600 . ? 
C23 H23B 0.9600 . ? 
C23 H23C 0.9600 . ? 
C24 H24A 0.9600 . ? 
C24 H24B 0.9600 . ? 
C24 H24C 0.9600 . ? 
  
loop_ 
 _geom_angle_atom_site_label_1 
 _geom_angle_atom_site_label_2 
 _geom_angle_atom_site_label_3 
 _geom_angle 
 _geom_angle_site_symmetry_1 
 _geom_angle_site_symmetry_3 
 _geom_angle_publ_flag 
C19 O1 C20 105.5(6) . . ? 
C19 N1 C21 106.2(6) . . ? 
C19 N1 Cu1 126.2(5) . . ? 
C21 N1 Cu1 127.5(5) . . ? 
C6 Fe1 C5 117.1(4) . . ? 
C6 Fe1 C7 40.3(4) . . ? 
C5 Fe1 C7 149.2(4) . . ? 
C6 Fe1 C1 108.8(4) . . ? 
C5 Fe1 C1 41.6(3) . . ? 
C7 Fe1 C1 115.9(4) . . ? 
C6 Fe1 C9 68.0(4) . . ? 
C5 Fe1 C9 130.8(4) . . ? 
C7 Fe1 C9 68.0(4) . . ? 
C1 Fe1 C9 170.4(4) . . ? 
C6 Fe1 C10 40.4(4) . . ? 
C5 Fe1 C10 109.3(4) . . ? 
C7 Fe1 C10 67.8(4) . . ? 
C1 Fe1 C10 131.5(4) . . ? 
C9 Fe1 C10 40.3(4) . . ? 
C6 Fe1 C2 130.9(3) . . ? 
C5 Fe1 C2 69.4(3) . . ? 
C7 Fe1 C2 108.2(4) . . ? 
C1 Fe1 C2 41.2(3) . . ? 
C9 Fe1 C2 147.6(4) . . ? 
C10 Fe1 C2 170.3(4) . . ? 
C6 Fe1 C8 67.8(4) . . ? 
C5 Fe1 C8 169.1(4) . . ? 
C7 Fe1 C8 40.5(4) . . ? 
C1 Fe1 C8 148.1(4) . . ? 
C9 Fe1 C8 40.2(4) . . ? 
C10 Fe1 C8 67.6(4) . . ? 
C2 Fe1 C8 115.5(4) . . ? 
C6 Fe1 C4 149.3(4) . . ? 
C5 Fe1 C4 40.0(3) . . ? 
C7 Fe1 C4 169.5(4) . . ? 
C1 Fe1 C4 68.4(3) . . ? 
C9 Fe1 C4 109.4(3) . . ? 
C10 Fe1 C4 117.4(4) . . ? 
C2 Fe1 C4 68.2(3) . . ? 
C8 Fe1 C4 131.1(4) . . ? 
C6 Fe1 C3 169.2(4) . . ? 
C5 Fe1 C3 68.0(3) . . ? 
C7 Fe1 C3 130.7(4) . . ? 
C1 Fe1 C3 68.1(3) . . ? 
C9 Fe1 C3 116.8(4) . . ? 
C10 Fe1 C3 149.2(4) . . ? 
C2 Fe1 C3 40.0(3) . . ? 
C8 Fe1 C3 109.0(4) . . ? 
C4 Fe1 C3 40.4(3) . . ? 
N1 Cu1 C12 94.3(3) . . ? 
N1 Cu1 C11 129.6(3) . . ? 
C12 Cu1 C11 36.0(3) . . ? 
N1 Cu1 I1 112.87(18) . . ? 
C12 Cu1 I1 151.7(2) . . ? 
C11 Cu1 I1 117.5(2) . . ? 
C11 C1 C2 125.9(7) . . ? 
C11 C1 C5 126.7(7) . . ? 
C2 C1 C5 106.9(6) . . ? 
C11 C1 Fe1 120.8(5) . . ? 
C2 C1 Fe1 69.7(4) . . ? 
C5 C1 Fe1 68.6(4) . . ? 
C3 C2 C1 107.4(7) . . ? 
C3 C2 Fe1 70.1(4) . . ? 
C1 C2 Fe1 69.1(4) . . ? 
C3 C2 H2 126.3 . . ? 
C1 C2 H2 126.3 . . ? 
Fe1 C2 H2 126.3 . . ? 
C2 C3 C4 109.3(7) . . ? 
C2 C3 Fe1 69.9(4) . . ? 
C4 C3 Fe1 69.7(4) . . ? 
C2 C3 H3 125.3 . . ? 
C4 C3 H3 125.3 . . ? 
Fe1 C3 H3 125.3 . . ? 
C5 C4 C3 108.3(7) . . ? 
C5 C4 Fe1 69.0(4) . . ? 
C3 C4 Fe1 69.9(5) . . ? 
C5 C4 H4 125.8 . . ? 
C3 C4 H4 125.8 . . ? 
Fe1 C4 H4 125.8 . . ? 
C4 C5 C1 108.1(7) . . ? 
C4 C5 Fe1 70.9(4) . . ? 
C1 C5 Fe1 69.8(4) . . ? 
C4 C5 H5 125.9 . . ? 
C1 C5 H5 125.9 . . ? 
Fe1 C5 H5 125.9 . . ? 
C7 C6 C10 108.8(10) . . ? 
C7 C6 Fe1 70.5(5) . . ? 
C10 C6 Fe1 70.9(5) . . ? 
C7 C6 H6 125.6 . . ? 
C10 C6 H6 125.6 . . ? 
Fe1 C6 H6 125.6 . . ? 
C6 C7 C8 107.8(9) . . ? 
C6 C7 Fe1 69.2(5) . . ? 
C8 C7 Fe1 70.3(5) . . ? 
C6 C7 H7 126.1 . . ? 
C8 C7 H7 126.1 . . ? 
Fe1 C7 H7 126.1 . . ? 
C9 C8 C7 107.8(10) . . ? 
C9 C8 Fe1 69.6(5) . . ? 
C7 C8 Fe1 69.2(5) . . ? 
C9 C8 H8 126.1 . . ? 
C7 C8 H8 126.1 . . ? 
Fe1 C8 H8 126.1 . . ? 
C8 C9 C10 108.0(9) . . ? 
C8 C9 Fe1 70.2(5) . . ? 
C10 C9 Fe1 70.0(5) . . ? 
C8 C9 H9 126.0 . . ? 
C10 C9 H9 126.0 . . ? 
Fe1 C9 H9 126.0 . . ? 
C6 C10 C9 107.6(9) . . ? 
C6 C10 Fe1 68.7(5) . . ? 
C9 C10 Fe1 69.6(5) . . ? 
C6 C10 H10 126.2 . . ? 
C9 C10 H10 126.2 . . ? 
Fe1 C10 H10 126.2 . . ? 
C12 C11 C1 159.5(7) . . ? 
C12 C11 Cu1 69.8(5) . . ? 
C1 C11 Cu1 130.6(5) . . ? 
C11 C12 C13 162.9(7) . . ? 
C11 C12 Cu1 74.2(5) . . ? 
C13 C12 Cu1 122.9(5) . . ? 
C18 C13 C14 119.3(7) . . ? 
C18 C13 C12 125.0(7) . . ? 
C14 C13 C12 115.7(7) . . ? 
C15 C14 C13 119.0(8) . . ? 
C15 C14 H14 120.5 . . ? 
C13 C14 H14 120.5 . . ? 
C14 C15 C16 121.5(9) . . ? 
C14 C15 H15 119.2 . . ? 
C16 C15 H15 119.2 . . ? 
C15 C16 C17 120.9(8) . . ? 
C15 C16 H16 119.5 . . ? 
C17 C16 H16 119.5 . . ? 
C16 C17 C18 120.3(8) . . ? 
C16 C17 H17 119.8 . . ? 
C18 C17 H17 119.8 . . ? 
C17 C18 C13 118.9(7) . . ? 
C17 C18 C19 118.0(7) . . ? 
C13 C18 C19 122.9(7) . . ? 
N1 C19 O1 118.0(7) . . ? 
N1 C19 C18 126.5(7) . . ? 
O1 C19 C18 115.4(6) . . ? 
O1 C20 C21 103.8(6) . . ? 
O1 C20 H20A 111.0 . . ? 
C21 C20 H20A 111.0 . . ? 
O1 C20 H20B 111.0 . . ? 
C21 C20 H20B 111.0 . . ? 
H20A C20 H20B 109.0 . . ? 
N1 C21 C20 101.4(6) . . ? 
N1 C21 C22 108.5(6) . . ? 
C20 C21 C22 113.8(6) . . ? 
N1 C21 H21 110.9 . . ? 
C20 C21 H21 110.9 . . ? 
C22 C21 H21 110.9 . . ? 
C24 C22 C23 109.4(7) . . ? 
C24 C22 C21 112.2(7) . . ? 
C23 C22 C21 110.7(7) . . ? 
C24 C22 H22 108.1 . . ? 
C23 C22 H22 108.1 . . ? 
C21 C22 H22 108.1 . . ? 
C22 C23 H23A 109.5 . . ? 
C22 C23 H23B 109.5 . . ? 
H23A C23 H23B 109.5 . . ? 
C22 C23 H23C 109.5 . . ? 
H23A C23 H23C 109.5 . . ? 
H23B C23 H23C 109.5 . . ? 
C22 C24 H24A 109.5 . . ? 
C22 C24 H24B 109.5 . . ? 
H24A C24 H24B 109.5 . . ? 
C22 C24 H24C 109.5 . . ? 
H24A C24 H24C 109.5 . . ? 
H24B C24 H24C 109.5 . . ? 
  
loop_ 
 _geom_torsion_atom_site_label_1 
 _geom_torsion_atom_site_label_2 
 _geom_torsion_atom_site_label_3 
 _geom_torsion_atom_site_label_4 
 _geom_torsion 
 _geom_torsion_site_symmetry_1 
 _geom_torsion_site_symmetry_2 
 _geom_torsion_site_symmetry_3 
 _geom_torsion_site_symmetry_4 
 _geom_torsion_publ_flag 
C19 N1 Cu1 C12 16.5(7) . . . . ? 
C21 N1 Cu1 C12 -168.3(6) . . . . ? 
C19 N1 Cu1 C11 24.7(8) . . . . ? 
C21 N1 Cu1 C11 -160.1(5) . . . . ? 
C19 N1 Cu1 I1 -155.6(6) . . . . ? 
C21 N1 Cu1 I1 19.6(6) . . . . ? 
C6 Fe1 C1 C11 -10.9(7) . . . . ? 
C5 Fe1 C1 C11 -120.9(8) . . . . ? 
C7 Fe1 C1 C11 32.1(8) . . . . ? 
C9 Fe1 C1 C11 -80(2) . . . . ? 
C10 Fe1 C1 C11 -50.3(8) . . . . ? 
C2 Fe1 C1 C11 120.5(8) . . . . ? 
C8 Fe1 C1 C11 67.1(10) . . . . ? 
C4 Fe1 C1 C11 -158.3(7) . . . . ? 
C3 Fe1 C1 C11 158.0(7) . . . . ? 
C6 Fe1 C1 C2 -131.4(5) . . . . ? 
C5 Fe1 C1 C2 118.6(6) . . . . ? 
C7 Fe1 C1 C2 -88.4(6) . . . . ? 
C9 Fe1 C1 C2 160(2) . . . . ? 
C10 Fe1 C1 C2 -170.8(5) . . . . ? 
C8 Fe1 C1 C2 -53.4(9) . . . . ? 
C4 Fe1 C1 C2 81.2(5) . . . . ? 
C3 Fe1 C1 C2 37.5(5) . . . . ? 
C6 Fe1 C1 C5 110.0(5) . . . . ? 
C7 Fe1 C1 C5 153.0(5) . . . . ? 
C9 Fe1 C1 C5 41(2) . . . . ? 
C10 Fe1 C1 C5 70.6(7) . . . . ? 
C2 Fe1 C1 C5 -118.6(6) . . . . ? 
C8 Fe1 C1 C5 -172.0(7) . . . . ? 
C4 Fe1 C1 C5 -37.4(5) . . . . ? 
C3 Fe1 C1 C5 -81.1(5) . . . . ? 
C11 C1 C2 C3 -173.8(7) . . . . ? 
C5 C1 C2 C3 -1.3(8) . . . . ? 
Fe1 C1 C2 C3 -60.0(5) . . . . ? 
C11 C1 C2 Fe1 -113.9(7) . . . . ? 
C5 C1 C2 Fe1 58.7(5) . . . . ? 
C6 Fe1 C2 C3 -171.5(6) . . . . ? 
C5 Fe1 C2 C3 80.0(5) . . . . ? 
C7 Fe1 C2 C3 -132.6(6) . . . . ? 
C1 Fe1 C2 C3 118.5(7) . . . . ? 
C9 Fe1 C2 C3 -55.3(8) . . . . ? 
C10 Fe1 C2 C3 164(2) . . . . ? 
C8 Fe1 C2 C3 -89.5(6) . . . . ? 
C4 Fe1 C2 C3 36.9(5) . . . . ? 
C6 Fe1 C2 C1 70.0(7) . . . . ? 
C5 Fe1 C2 C1 -38.6(4) . . . . ? 
C7 Fe1 C2 C1 108.9(5) . . . . ? 
C9 Fe1 C2 C1 -173.8(6) . . . . ? 
C10 Fe1 C2 C1 45(2) . . . . ? 
C8 Fe1 C2 C1 152.0(5) . . . . ? 
C4 Fe1 C2 C1 -81.6(5) . . . . ? 
C3 Fe1 C2 C1 -118.5(7) . . . . ? 
C1 C2 C3 C4 0.6(9) . . . . ? 
Fe1 C2 C3 C4 -58.7(6) . . . . ? 
C1 C2 C3 Fe1 59.3(5) . . . . ? 
C6 Fe1 C3 C2 36(2) . . . . ? 
C5 Fe1 C3 C2 -83.7(5) . . . . ? 
C7 Fe1 C3 C2 67.3(7) . . . . ? 
C1 Fe1 C3 C2 -38.6(5) . . . . ? 
C9 Fe1 C3 C2 150.5(5) . . . . ? 
C10 Fe1 C3 C2 -174.7(7) . . . . ? 
C8 Fe1 C3 C2 107.4(5) . . . . ? 
C4 Fe1 C3 C2 -120.7(7) . . . . ? 
C6 Fe1 C3 C4 157.1(19) . . . . ? 
C5 Fe1 C3 C4 37.0(5) . . . . ? 
C7 Fe1 C3 C4 -172.0(5) . . . . ? 
C1 Fe1 C3 C4 82.0(5) . . . . ? 
C9 Fe1 C3 C4 -88.9(6) . . . . ? 
C10 Fe1 C3 C4 -54.0(9) . . . . ? 
C2 Fe1 C3 C4 120.7(7) . . . . ? 
C8 Fe1 C3 C4 -131.9(5) . . . . ? 
C2 C3 C4 C5 0.4(9) . . . . ? 
Fe1 C3 C4 C5 -58.4(5) . . . . ? 
C2 C3 C4 Fe1 58.8(6) . . . . ? 
C6 Fe1 C4 C5 -51.8(9) . . . . ? 
C7 Fe1 C4 C5 155.3(19) . . . . ? 
C1 Fe1 C4 C5 38.9(5) . . . . ? 
C9 Fe1 C4 C5 -131.1(5) . . . . ? 
C10 Fe1 C4 C5 -87.8(6) . . . . ? 
C2 Fe1 C4 C5 83.4(5) . . . . ? 
C8 Fe1 C4 C5 -171.0(6) . . . . ? 
C3 Fe1 C4 C5 120.0(7) . . . . ? 
C6 Fe1 C4 C3 -171.8(7) . . . . ? 
C5 Fe1 C4 C3 -120.0(7) . . . . ? 
C7 Fe1 C4 C3 35(2) . . . . ? 
C1 Fe1 C4 C3 -81.1(5) . . . . ? 
C9 Fe1 C4 C3 108.9(5) . . . . ? 
C10 Fe1 C4 C3 152.2(5) . . . . ? 
C2 Fe1 C4 C3 -36.5(4) . . . . ? 
C8 Fe1 C4 C3 69.0(7) . . . . ? 
C3 C4 C5 C1 -1.2(9) . . . . ? 
Fe1 C4 C5 C1 -60.1(5) . . . . ? 
C3 C4 C5 Fe1 59.0(6) . . . . ? 
C11 C1 C5 C4 174.0(7) . . . . ? 
C2 C1 C5 C4 1.5(8) . . . . ? 
Fe1 C1 C5 C4 60.9(5) . . . . ? 
C11 C1 C5 Fe1 113.1(7) . . . . ? 
C2 C1 C5 Fe1 -59.4(5) . . . . ? 
C6 Fe1 C5 C4 153.2(5) . . . . ? 
C7 Fe1 C5 C4 -171.4(7) . . . . ? 
C1 Fe1 C5 C4 -118.5(7) . . . . ? 
C9 Fe1 C5 C4 69.8(7) . . . . ? 
C10 Fe1 C5 C4 109.9(6) . . . . ? 
C2 Fe1 C5 C4 -80.3(5) . . . . ? 
C8 Fe1 C5 C4 39(2) . . . . ? 
C3 Fe1 C5 C4 -37.3(5) . . . . ? 
C6 Fe1 C5 C1 -88.2(6) . . . . ? 
C7 Fe1 C5 C1 -52.9(9) . . . . ? 
C9 Fe1 C5 C1 -171.7(5) . . . . ? 
C10 Fe1 C5 C1 -131.5(5) . . . . ? 
C2 Fe1 C5 C1 38.2(5) . . . . ? 
C8 Fe1 C5 C1 157(2) . . . . ? 
C4 Fe1 C5 C1 118.5(7) . . . . ? 
C3 Fe1 C5 C1 81.3(5) . . . . ? 
C5 Fe1 C6 C7 152.8(6) . . . . ? 
C1 Fe1 C6 C7 108.2(6) . . . . ? 
C9 Fe1 C6 C7 -81.4(7) . . . . ? 
C10 Fe1 C6 C7 -118.9(9) . . . . ? 
C2 Fe1 C6 C7 67.4(8) . . . . ? 
C8 Fe1 C6 C7 -37.9(6) . . . . ? 
C4 Fe1 C6 C7 -172.6(7) . . . . ? 
C3 Fe1 C6 C7 37(2) . . . . ? 
C5 Fe1 C6 C10 -88.3(7) . . . . ? 
C7 Fe1 C6 C10 118.9(9) . . . . ? 
C1 Fe1 C6 C10 -132.9(6) . . . . ? 
C9 Fe1 C6 C10 37.5(6) . . . . ? 
C2 Fe1 C6 C10 -173.7(6) . . . . ? 
C8 Fe1 C6 C10 81.0(7) . . . . ? 
C4 Fe1 C6 C10 -53.7(10) . . . . ? 
C3 Fe1 C6 C10 155.9(18) . . . . ? 
C10 C6 C7 C8 -0.9(10) . . . . ? 
Fe1 C6 C7 C8 60.0(6) . . . . ? 
C10 C6 C7 Fe1 -60.9(6) . . . . ? 
C5 Fe1 C7 C6 -52.8(10) . . . . ? 
C1 Fe1 C7 C6 -88.9(6) . . . . ? 
C9 Fe1 C7 C6 81.5(7) . . . . ? 
C10 Fe1 C7 C6 37.8(6) . . . . ? 
C2 Fe1 C7 C6 -132.8(6) . . . . ? 
C8 Fe1 C7 C6 118.9(9) . . . . ? 
C4 Fe1 C7 C6 158.9(18) . . . . ? 
C3 Fe1 C7 C6 -171.4(5) . . . . ? 
C6 Fe1 C7 C8 -118.9(9) . . . . ? 
C5 Fe1 C7 C8 -171.7(7) . . . . ? 
C1 Fe1 C7 C8 152.3(6) . . . . ? 
C9 Fe1 C7 C8 -37.4(6) . . . . ? 
C10 Fe1 C7 C8 -81.1(7) . . . . ? 
C2 Fe1 C7 C8 108.3(6) . . . . ? 
C4 Fe1 C7 C8 40(2) . . . . ? 
C3 Fe1 C7 C8 69.7(7) . . . . ? 
C6 C7 C8 C9 -0.2(10) . . . . ? 
Fe1 C7 C8 C9 59.1(6) . . . . ? 
C6 C7 C8 Fe1 -59.3(6) . . . . ? 
C6 Fe1 C8 C9 -81.7(7) . . . . ? 
C5 Fe1 C8 C9 37(2) . . . . ? 
C7 Fe1 C8 C9 -119.4(9) . . . . ? 
C1 Fe1 C8 C9 -171.9(7) . . . . ? 
C10 Fe1 C8 C9 -37.9(6) . . . . ? 
C2 Fe1 C8 C9 152.2(6) . . . . ? 
C4 Fe1 C8 C9 69.6(8) . . . . ? 
C3 Fe1 C8 C9 109.4(7) . . . . ? 
C6 Fe1 C8 C7 37.7(6) . . . . ? 
C5 Fe1 C8 C7 156.8(19) . . . . ? 
C1 Fe1 C8 C7 -52.5(10) . . . . ? 
C9 Fe1 C8 C7 119.4(9) . . . . ? 
C10 Fe1 C8 C7 81.5(7) . . . . ? 
C2 Fe1 C8 C7 -88.4(6) . . . . ? 
C4 Fe1 C8 C7 -171.0(5) . . . . ? 
C3 Fe1 C8 C7 -131.2(6) . . . . ? 
C7 C8 C9 C10 1.2(10) . . . . ? 
Fe1 C8 C9 C10 60.1(6) . . . . ? 
C7 C8 C9 Fe1 -58.8(6) . . . . ? 
C6 Fe1 C9 C8 81.2(7) . . . . ? 
C5 Fe1 C9 C8 -171.3(6) . . . . ? 
C7 Fe1 C9 C8 37.6(6) . . . . ? 
C1 Fe1 C9 C8 153(2) . . . . ? 
C10 Fe1 C9 C8 118.7(9) . . . . ? 
C2 Fe1 C9 C8 -51.8(9) . . . . ? 
C4 Fe1 C9 C8 -131.5(6) . . . . ? 
C3 Fe1 C9 C8 -88.1(7) . . . . ? 
C6 Fe1 C9 C10 -37.5(6) . . . . ? 
C5 Fe1 C9 C10 70.0(7) . . . . ? 
C7 Fe1 C9 C10 -81.1(6) . . . . ? 
C1 Fe1 C9 C10 35(2) . . . . ? 
C2 Fe1 C9 C10 -170.6(6) . . . . ? 
C8 Fe1 C9 C10 -118.7(9) . . . . ? 
C4 Fe1 C9 C10 109.8(6) . . . . ? 
C3 Fe1 C9 C10 153.2(6) . . . . ? 
C7 C6 C10 C9 1.7(10) . . . . ? 
Fe1 C6 C10 C9 -59.0(6) . . . . ? 
C7 C6 C10 Fe1 60.7(6) . . . . ? 
C8 C9 C10 C6 -1.8(10) . . . . ? 
Fe1 C9 C10 C6 58.4(6) . . . . ? 
C8 C9 C10 Fe1 -60.2(6) . . . . ? 
C5 Fe1 C10 C6 109.5(6) . . . . ? 
C7 Fe1 C10 C6 -37.7(7) . . . . ? 
C1 Fe1 C10 C6 67.9(8) . . . . ? 
C9 Fe1 C10 C6 -119.4(9) . . . . ? 
C2 Fe1 C10 C6 29(3) . . . . ? 
C8 Fe1 C10 C6 -81.6(7) . . . . ? 
C4 Fe1 C10 C6 152.4(6) . . . . ? 
C3 Fe1 C10 C6 -171.4(7) . . . . ? 
C6 Fe1 C10 C9 119.4(9) . . . . ? 
C5 Fe1 C10 C9 -131.1(6) . . . . ? 
C7 Fe1 C10 C9 81.7(6) . . . . ? 
C1 Fe1 C10 C9 -172.7(5) . . . . ? 
C2 Fe1 C10 C9 149(2) . . . . ? 
C8 Fe1 C10 C9 37.8(6) . . . . ? 
C4 Fe1 C10 C9 -88.2(6) . . . . ? 
C3 Fe1 C10 C9 -52.0(10) . . . . ? 
C2 C1 C11 C12 163.6(18) . . . . ? 
C5 C1 C11 C12 -8(3) . . . . ? 
Fe1 C1 C11 C12 78(2) . . . . ? 
C2 C1 C11 Cu1 -8.6(11) . . . . ? 
C5 C1 C11 Cu1 -179.7(6) . . . . ? 
Fe1 C1 C11 Cu1 -94.6(7) . . . . ? 
N1 Cu1 C11 C12 -14.0(6) . . . . ? 
I1 Cu1 C11 C12 166.3(4) . . . . ? 
N1 Cu1 C11 C1 163.1(6) . . . . ? 
C12 Cu1 C11 C1 177.1(10) . . . . ? 
I1 Cu1 C11 C1 -16.6(7) . . . . ? 
C1 C11 C12 C13 3(4) . . . . ? 
Cu1 C11 C12 C13 177(3) . . . . ? 
C1 C11 C12 Cu1 -174(2) . . . . ? 
N1 Cu1 C12 C11 169.2(5) . . . . ? 
I1 Cu1 C12 C11 -26.2(7) . . . . ? 
N1 Cu1 C12 C13 -9.7(6) . . . . ? 
C11 Cu1 C12 C13 -178.9(9) . . . . ? 
I1 Cu1 C12 C13 154.8(4) . . . . ? 
C11 C12 C13 C18 -175(2) . . . . ? 
Cu1 C12 C13 C18 1.3(10) . . . . ? 
C11 C12 C13 C14 7(3) . . . . ? 
Cu1 C12 C13 C14 -176.9(5) . . . . ? 
C18 C13 C14 C15 1.6(12) . . . . ? 
C12 C13 C14 C15 179.9(8) . . . . ? 
C13 C14 C15 C16 -1.8(14) . . . . ? 
C14 C15 C16 C17 1.4(16) . . . . ? 
C15 C16 C17 C18 -0.8(15) . . . . ? 
C16 C17 C18 C13 0.6(13) . . . . ? 
C16 C17 C18 C19 175.9(8) . . . . ? 
C14 C13 C18 C17 -1.0(11) . . . . ? 
C12 C13 C18 C17 -179.2(7) . . . . ? 
C14 C13 C18 C19 -176.1(7) . . . . ? 
C12 C13 C18 C19 5.8(12) . . . . ? 
C21 N1 C19 O1 -7.1(9) . . . . ? 
Cu1 N1 C19 O1 169.0(5) . . . . ? 
C21 N1 C19 C18 169.3(7) . . . . ? 
Cu1 N1 C19 C18 -14.7(11) . . . . ? 
C20 O1 C19 N1 -8.1(9) . . . . ? 
C20 O1 C19 C18 175.2(7) . . . . ? 
C17 C18 C19 N1 -173.9(8) . . . . ? 
C13 C18 C19 N1 1.2(12) . . . . ? 
C17 C18 C19 O1 2.6(11) . . . . ? 
C13 C18 C19 O1 177.7(7) . . . . ? 
C19 O1 C20 C21 19.1(8) . . . . ? 
C19 N1 C21 C20 18.2(8) . . . . ? 
Cu1 N1 C21 C20 -157.8(5) . . . . ? 
C19 N1 C21 C22 -102.0(7) . . . . ? 
Cu1 N1 C21 C22 82.1(7) . . . . ? 
O1 C20 C21 N1 -22.1(7) . . . . ? 
O1 C20 C21 C22 94.2(7) . . . . ? 
N1 C21 C22 C24 -61.0(8) . . . . ? 
C20 C21 C22 C24 -173.1(7) . . . . ? 
N1 C21 C22 C23 176.3(7) . . . . ? 
C20 C21 C22 C23 64.3(9) . . . . ? 
  
_diffrn_measured_fraction_theta_max    1.000 
_diffrn_reflns_theta_full              24.99 
_diffrn_measured_fraction_theta_full   1.000 
_refine_diff_density_max    1.117 
_refine_diff_density_min   -0.615 
_refine_diff_density_rms    0.137 
#===END

##Crystallographic data of 4b

  
  
data_4b 
  
_audit_creation_method            SHELXL-97 
_chemical_name_systematic 
; 
 ? 
; 
_chemical_name_common             ? 
_chemical_melting_point           ? 
_chemical_formula_moiety          
 'C23.72 H23 Br Cu Fe N O, C24 H23 Br Cu Fe N O' 
_chemical_formula_sum 
 'C47.72 H46 Br2 Cu2 Fe2 N2 O2' 
_chemical_formula_weight          1078.11 
  
loop_ 
 _atom_type_symbol 
 _atom_type_description 
 _atom_type_scat_dispersion_real 
 _atom_type_scat_dispersion_imag 
 _atom_type_scat_source 
 'C'  'C'   0.0033   0.0016 
 'International Tables Vol C Tables 4.2.6.8 and 6.1.1.4' 
 'H'  'H'   0.0000   0.0000 
 'International Tables Vol C Tables 4.2.6.8 and 6.1.1.4' 
 'N'  'N'   0.0061   0.0033 
 'International Tables Vol C Tables 4.2.6.8 and 6.1.1.4' 
 'O'  'O'   0.0106   0.0060 
 'International Tables Vol C Tables 4.2.6.8 and 6.1.1.4' 
 'Fe'  'Fe'   0.3463   0.8444 
 'International Tables Vol C Tables 4.2.6.8 and 6.1.1.4' 
 'Cu'  'Cu'   0.3201   1.2651 
 'International Tables Vol C Tables 4.2.6.8 and 6.1.1.4' 
 'I'  'I'  -0.4742   1.8119 
 'International Tables Vol C Tables 4.2.6.8 and 6.1.1.4' 
 'Br'  'Br'  -0.2901   2.4595 
 'International Tables Vol C Tables 4.2.6.8 and 6.1.1.4' 
  
_symmetry_cell_setting            Triclinic 
_symmetry_space_group_name_H-M    P1 
_symmetry_space_group_name_Hall   P1  

  
loop_ 
 _symmetry_equiv_pos_as_xyz 
 'x, y, z' 
  
_cell_length_a                    8.846(3) 
_cell_length_b                    11.295(4) 
_cell_length_c                    12.422(4) 
_cell_angle_alpha                 72.460(7) 
_cell_angle_beta                  73.915(6) 
_cell_angle_gamma                 70.961(7) 
_cell_volume                      1096.5(6) 
_cell_formula_units_Z             1 
_cell_measurement_temperature     298(2) 
_cell_measurement_reflns_used     733 
_cell_measurement_theta_min       2.31 
_cell_measurement_theta_max       16.83 
  
_exptl_crystal_description        block 
_exptl_crystal_colour             red 
_exptl_crystal_size_max           0.186 
_exptl_crystal_size_mid           0.154 
_exptl_crystal_size_min           0.137 
_exptl_crystal_density_meas       ? 
_exptl_crystal_density_diffrn     1.633 
_exptl_crystal_density_method     'not measured' 
_exptl_crystal_F_000              542.3 
_exptl_absorpt_coefficient_mu     3.468 
_exptl_absorpt_correction_type    multi-scan 
_exptl_absorpt_correction_T_min   0.532 
_exptl_absorpt_correction_T_max   0.622 
_exptl_absorpt_process_details    '(SADABS; Bruker, 2000)'  
  
_exptl_special_details 
; 
 ? 
; 
  
_diffrn_ambient_temperature       298(2) 
_diffrn_radiation_wavelength      0.71073 
_diffrn_radiation_type            MoK\a 
_diffrn_radiation_source          'fine-focus sealed tube' 
_diffrn_radiation_monochromator   graphite 
_diffrn_measurement_device_type   'CCD area detector' 
_diffrn_measurement_method        'phi and omega scans' 
_diffrn_detector_area_resol_mean  ? 
_diffrn_standards_number          ? 
_diffrn_standards_interval_count  ? 
_diffrn_standards_interval_time   ? 
_diffrn_standards_decay_%         ? 
_diffrn_reflns_number             5665 
_diffrn_reflns_av_R_equivalents   0.0412 
_diffrn_reflns_av_sigmaI/netI     0.1340 
_diffrn_reflns_limit_h_min        -10 
_diffrn_reflns_limit_h_max        10 
_diffrn_reflns_limit_k_min        -13 
_diffrn_reflns_limit_k_max        13 
_diffrn_reflns_limit_l_min        -14 
_diffrn_reflns_limit_l_max        11 
_diffrn_reflns_theta_min          1.96 
_diffrn_reflns_theta_max          25.00 
_reflns_number_total              4707 
_reflns_number_gt                 3047 
_reflns_threshold_expression      >2sigma(I) 
  
_computing_data_collection        'Bruker SMART' 
_computing_cell_refinement        'Bruker SMART' 
_computing_data_reduction         'Bruker SAINT' 
_computing_structure_solution     'SHELXS-97 (Sheldrick, 1990)' 
_computing_structure_refinement   'SHELXL-97 (Sheldrick, 1997)' 
_computing_molecular_graphics     'Bruker SHELXTL' 
_computing_publication_material   'Bruker SHELXTL' 
  
_refine_special_details 
; 
 Refinement of F^2^ against ALL reflections.  The weighted R-factor wR and 
 goodness of fit S are based on F^2^, conventional R-factors R are based 
 on F, with F set to zero for negative F^2^. The threshold expression of 
 F^2^ > 2sigma(F^2^) is used only for calculating R-factors(gt) etc. and is 
 not relevant to the choice of reflections for refinement.  R-factors based 
 on F^2^ are statistically about twice as large as those based on F, and R- 
 factors based on ALL data will be even larger. 
; 
  
_refine_ls_structure_factor_coef  Fsqd 
_refine_ls_matrix_type            full 
_refine_ls_weighting_scheme       calc 
_refine_ls_weighting_details 
 'calc w=1/[\s^2^(Fo^2^)+(0.0208P)^2^+0.0000P] where P=(Fo^2^+2Fc^2^)/3' 
_atom_sites_solution_primary      direct 
_atom_sites_solution_secondary    difmap 
_atom_sites_solution_hydrogens    geom 
_refine_ls_hydrogen_treatment     mixed 
_refine_ls_extinction_method      none 
_chemical_absolute_configuration syn
_refine_ls_extinction_coef        ? 
_refine_ls_abs_structure_details 
 'Flack H D (1983), Acta Cryst. A39, 876-881' 
_refine_ls_abs_structure_Flack    0.01(2) 
_refine_ls_number_reflns          4707 
_refine_ls_number_parameters      518 
_refine_ls_number_restraints      4 
_refine_ls_R_factor_all           0.1070 
_refine_ls_R_factor_gt            0.0614 
_refine_ls_wR_factor_ref          0.1356 
_refine_ls_wR_factor_gt           0.1177 
_refine_ls_goodness_of_fit_ref    0.960 
_refine_ls_restrained_S_all       0.960 
_refine_ls_shift/su_max           0.000 
_refine_ls_shift/su_mean          0.002 
  
loop_ 
 _atom_site_label 
 _atom_site_type_symbol 
 _atom_site_fract_x 
 _atom_site_fract_y 
 _atom_site_fract_z 
 _atom_site_U_iso_or_equiv 
 _atom_site_adp_type 
 _atom_site_occupancy 
 _atom_site_symmetry_multiplicity 
 _atom_site_calc_flag 
 _atom_site_refinement_flags 
 _atom_site_disorder_assembly 
 _atom_site_disorder_group 
O1 O 1.2427(13) 0.8945(11) 0.1964(9) 0.068(3) Uani 1 1 d . . . 
C44 C 0.242(2) 0.2241(15) 0.5634(15) 0.083(6) Uani 1 1 d . . . 
H44A H 0.3196 0.2594 0.5001 0.100 Uiso 1 1 calc R . . 
H44B H 0.1738 0.1954 0.5328 0.100 Uiso 1 1 calc R . . 
N1 N 1.1385(12) 0.7273(11) 0.2541(9) 0.046(3) Uani 1 1 d . . . 
N2 N 0.3046(15) 0.1761(13) 0.7445(9) 0.059(3) Uani 1 1 d . . . 
Fe2 Fe 0.6492(2) 0.16044(19) 1.12790(17) 0.0512(6) Uani 1 1 d . . . 
Fe1 Fe 0.5485(2) 0.5312(2) 0.52496(18) 0.0554(6) Uani 1 1 d D . . 
Cu2 Cu 0.41582(18) 0.10337(16) 0.87346(15) 0.0527(5) Uani 1 1 d . . . 
Cu1 Cu 1.00970(17) 0.61023(14) 0.36043(13) 0.0456(5) Uani 1 1 d . . . 
Br2 Br 0.62953(19) -0.07465(17) 0.84000(15) 0.0778(6) Uani 1 1 d . . . 
Br1 Br 1.0672(2) 0.42248(14) 0.30132(14) 0.0757(6) Uani 1 1 d . . . 
C25 C 0.4633(17) 0.1027(15) 1.1094(13) 0.053(4) Uani 1 1 d . . . 
C29 C 0.4244(19) 0.1449(18) 1.2138(15) 0.076(5) Uani 1 1 d . . . 
H29 H 0.3322 0.2166 1.2338 0.091 Uiso 1 1 calc R . . 
C28 C 0.542(2) 0.067(2) 1.2849(13) 0.083(6) Uani 1 1 d . . . 
H28 H 0.5444 0.0754 1.3606 0.099 Uiso 1 1 calc R . . 
C27 C 0.653(2) -0.0194(15) 1.2244(14) 0.062(4) Uani 1 1 d . . . 
H27 H 0.7488 -0.0844 1.2499 0.075 Uiso 1 1 calc R . . 
C26 C 0.6060(17) 0.0008(13) 1.1208(13) 0.055(4) Uani 1 1 d . . . 
H26 H 0.6662 -0.0484 1.0620 0.065 Uiso 1 1 calc R . . 
C33 C 0.674(3) 0.319(2) 0.9952(19) 0.097(7) Uani 1 1 d . . . 
H33 H 0.6008 0.3652 0.9404 0.117 Uiso 1 1 calc R . . 
C32 C 0.661(3) 0.3451(19) 1.105(2) 0.102(7) Uani 1 1 d . . . 
H32 H 0.5764 0.4128 1.1382 0.123 Uiso 1 1 calc R . . 
C31 C 0.787(3) 0.262(2) 1.1515(19) 0.095(7) Uani 1 1 d . . . 
H31 H 0.8062 0.2589 1.2265 0.114 Uiso 1 1 calc R . . 
C30 C 0.878(2) 0.1777(18) 1.085(2) 0.087(7) Uani 1 1 d . . . 
H30 H 0.9771 0.1091 1.1002 0.104 Uiso 1 1 calc R . . 
C34 C 0.808(3) 0.216(3) 0.9833(18) 0.105(6) Uani 1 1 d . . . 
H34 H 0.8491 0.1757 0.9173 0.126 Uiso 1 1 calc R . . 
C35 C 0.3775(17) 0.1635(14) 1.0163(12) 0.051(4) Uani 1 1 d . . . 
C36 C 0.2824(17) 0.2342(16) 0.9546(14) 0.057(4) Uani 1 1 d . . . 
C37 C 0.1599(17) 0.3431(14) 0.9145(14) 0.052(4) Uani 1 1 d . . . 
C38 C 0.0786(18) 0.4290(14) 0.9825(15) 0.062(4) Uani 1 1 d . . . 
H38 H 0.1054 0.4157 1.0533 0.074 Uiso 1 1 calc R . . 
C39 C -0.049(2) 0.5403(17) 0.9444(19) 0.080(6) Uani 1 1 d . . . 
H39 H -0.1094 0.5950 0.9932 0.096 Uiso 1 1 calc R . . 
C40 C -0.080(2) 0.5647(18) 0.8413(19) 0.085(6) Uani 1 1 d . . . 
H40 H -0.1593 0.6384 0.8158 0.102 Uiso 1 1 calc R . . 
C41 C 0.0037(19) 0.4809(15) 0.7714(15) 0.063(4) Uani 1 1 d . . . 
H41 H -0.0203 0.4990 0.6989 0.075 Uiso 1 1 calc R . . 
C42 C 0.1236(17) 0.3698(14) 0.8049(14) 0.052(4) Uani 1 1 d . . . 
C43 C 0.1964(17) 0.2831(15) 0.7288(12) 0.048(4) Uani 1 1 d . . . 
O2 O 0.1446(13) 0.3178(10) 0.6284(9) 0.065(3) Uani 1 1 d . . . 
C45 C 0.3287(19) 0.1146(15) 0.6487(13) 0.061(4) Uani 1 1 d . . . 
H45 H 0.4453 0.0889 0.6151 0.073 Uiso 1 1 calc R . . 
C46 C 0.2610(19) 0.0000(14) 0.6868(13) 0.060(4) Uani 1 1 d . . . 
H46 H 0.3105 -0.0576 0.7517 0.072 Uiso 1 1 calc R . . 
C47 C 0.081(3) 0.0278(19) 0.7286(16) 0.101(7) Uani 1 1 d . . . 
H47A H 0.0496 0.0707 0.7905 0.151 Uiso 1 1 calc R . . 
H47B H 0.0491 -0.0515 0.7555 0.151 Uiso 1 1 calc R . . 
H47C H 0.0269 0.0822 0.6666 0.151 Uiso 1 1 calc R . . 
C48 C 0.311(2) -0.0736(17) 0.5943(18) 0.099(6) Uani 1 1 d . . . 
H48A H 0.2699 -0.0188 0.5270 0.149 Uiso 1 1 calc R . . 
H48B H 0.2659 -0.1467 0.6216 0.149 Uiso 1 1 calc R . . 
H48C H 0.4274 -0.1025 0.5754 0.149 Uiso 1 1 calc R . . 
C1 C 0.7398(15) 0.5419(13) 0.5752(11) 0.043(3) Uani 1 1 d . . . 
C5 C 0.760(2) 0.4135(16) 0.5708(13) 0.063(4) Uani 1 1 d . . . 
H5 H 0.8501 0.3607 0.5248 0.075 Uiso 1 1 calc R . . 
C4 C 0.625(2) 0.3758(16) 0.6516(14) 0.070(5) Uani 1 1 d . . . 
H4 H 0.6041 0.2919 0.6663 0.084 Uiso 1 1 calc R . . 
C3 C 0.5260(18) 0.4726(16) 0.7012(13) 0.066(5) Uani 1 1 d . . . 
H3 H 0.4242 0.4700 0.7579 0.079 Uiso 1 1 calc R . . 
C2 C 0.5943(16) 0.5823(16) 0.6527(13) 0.058(4) Uani 1 1 d . . . 
H2 H 0.5507 0.6664 0.6724 0.070 Uiso 1 1 calc R . . 
C11 C 0.8391(16) 0.6258(13) 0.5032(11) 0.047(3) Uani 1 1 d . . . 
C12 C 0.8953(15) 0.7231(12) 0.4635(11) 0.041(3) Uani 1 1 d . . . 
C13 C 0.9167(14) 0.8448(12) 0.4507(11) 0.036(3) Uani 1 1 d . . . 
C14 C 0.8229(17) 0.9191(14) 0.5272(12) 0.055(4) Uani 1 1 d . . . 
H14 H 0.7479 0.8855 0.5876 0.066 Uiso 1 1 calc R . . 
C15 C 0.833(2) 1.0405(17) 0.5200(16) 0.076(5) Uani 1 1 d . . . 
H15 H 0.7674 1.0871 0.5741 0.091 Uiso 1 1 calc R . . 
C16 C 0.942(2) 1.0902(16) 0.4313(15) 0.067(5) Uani 1 1 d . . . 
H16 H 0.9524 1.1718 0.4244 0.081 Uiso 1 1 calc R . . 
C17 C 1.038(2) 1.0198(18) 0.3519(14) 0.063(4) Uani 1 1 d . . . 
H17 H 1.1134 1.0542 0.2922 0.075 Uiso 1 1 calc R . . 
C18 C 1.0249(17) 0.9002(12) 0.3592(12) 0.046(4) Uani 1 1 d . . . 
C19 C 1.1339(16) 0.8346(13) 0.2710(11) 0.040(3) Uani 1 1 d . . . 
C20 C 1.3479(19) 0.8059(15) 0.1243(14) 0.068(5) Uani 1 1 d . . . 
H20A H 1.4556 0.7709 0.1431 0.081 Uiso 1 1 calc R . . 
H20B H 1.3587 0.8495 0.0434 0.081 Uiso 1 1 calc R . . 
C21 C 1.2616(18) 0.6974(14) 0.1514(11) 0.051(4) Uani 1 1 d . . . 
H21 H 1.3383 0.6134 0.1730 0.061 Uiso 1 1 calc R . . 
C22 C 1.187(2) 0.6966(15) 0.0604(12) 0.060(4) Uani 1 1 d . . . 
H22 H 1.1278 0.6297 0.0914 0.072 Uiso 1 1 calc R . . 
C23 C 1.064(2) 0.8232(17) 0.0226(15) 0.084(5) Uani 1 1 d . . . 
H23A H 0.9922 0.8509 0.0893 0.126 Uiso 1 1 calc R . . 
H23B H 1.0010 0.8114 -0.0234 0.126 Uiso 1 1 calc R . . 
H23C H 1.1204 0.8872 -0.0219 0.126 Uiso 1 1 calc R . . 
C24 C 1.314(2) 0.6630(16) -0.0480(14) 0.093(6) Uani 1 1 d . . . 
H24A H 1.3531 0.7368 -0.0921 0.140 Uiso 1 1 calc R . . 
H24B H 1.2643 0.6383 -0.0943 0.140 Uiso 1 1 calc R . . 
H24C H 1.4042 0.5930 -0.0245 0.140 Uiso 1 1 calc R . . 
C8 C 0.349(3) 0.541(3) 0.4700(18) 0.109(7) Uani 1 1 d . . . 
H8 H 0.2700 0.4988 0.5145 0.131 Uiso 1 1 calc R . . 
C10 C 0.570(2) 0.597(3) 0.3518(13) 0.109(7) Uani 1.00(5) 1 d D . . 
H10 H 0.6691 0.5948 0.3006 0.131 Uiso 1 1 calc R . . 
C7 C 0.348(3) 0.6579(19) 0.465(2) 0.081(12) Uani 0.86(6) 1 d P . . 
H7 H 0.2635 0.7117 0.5057 0.097 Uiso 1 1 calc R . . 
C9 C 0.485(3) 0.494(2) 0.3985(19) 0.103(7) Uani 1 1 d . . . 
H9 H 0.5186 0.4135 0.3819 0.124 Uiso 1 1 calc R . . 
C6 C 0.472(4) 0.693(3) 0.399(2) 0.105(6) Uani 0.86(5) 1 d P . . 
H6 H 0.4915 0.7725 0.3869 0.126 Uiso 1 1 calc R . . 
  
loop_ 
 _atom_site_aniso_label 
 _atom_site_aniso_U_11 
 _atom_site_aniso_U_22 
 _atom_site_aniso_U_33 
 _atom_site_aniso_U_23 
 _atom_site_aniso_U_13 
 _atom_site_aniso_U_12 
O1 0.067(7) 0.089(8) 0.055(7) -0.011(6) 0.006(6) -0.050(7) 
C44 0.138(16) 0.048(10) 0.056(11) -0.003(9) 0.007(11) -0.046(11) 
N1 0.034(6) 0.053(8) 0.043(7) -0.001(6) -0.011(5) -0.008(6) 
N2 0.064(8) 0.081(9) 0.029(7) 0.000(7) -0.013(6) -0.025(8) 
Fe2 0.0466(12) 0.0571(13) 0.0511(13) -0.0102(11) -0.0107(10) -0.0168(10) 
Fe1 0.0586(13) 0.0608(13) 0.0513(14) -0.0006(11) -0.0147(11) -0.0298(11) 
Cu2 0.0458(10) 0.0582(12) 0.0522(11) -0.0065(9) -0.0132(8) -0.0141(9) 
Cu1 0.0527(10) 0.0422(10) 0.0396(10) -0.0064(8) -0.0017(8) -0.0185(8) 
Br2 0.0606(11) 0.0891(13) 0.0638(11) -0.0187(10) -0.0026(8) -0.0008(10) 
Br1 0.1095(15) 0.0485(10) 0.0600(11) -0.0160(8) 0.0057(10) -0.0248(9) 
C25 0.039(8) 0.070(11) 0.044(9) -0.003(8) 0.001(7) -0.023(8) 
C29 0.046(9) 0.104(14) 0.067(12) -0.009(11) -0.006(9) -0.019(10) 
C28 0.079(12) 0.139(18) 0.024(9) 0.010(10) -0.001(9) -0.055(13) 
C27 0.055(10) 0.070(11) 0.055(11) 0.014(9) -0.030(8) -0.016(9) 
C26 0.054(9) 0.052(9) 0.047(9) 0.015(7) -0.009(7) -0.025(8) 
C33 0.111(16) 0.077(14) 0.101(17) 0.040(12) -0.056(13) -0.048(13) 
C32 0.14(2) 0.072(14) 0.093(17) -0.042(13) -0.017(15) -0.015(14) 
C31 0.124(18) 0.068(13) 0.121(18) 0.011(14) -0.085(16) -0.042(13) 
C30 0.043(10) 0.054(11) 0.16(2) -0.016(13) -0.013(12) -0.022(8) 
C34 0.141(16) 0.121(15) 0.071(11) 0.021(11) -0.029(11) -0.090(14) 
C35 0.035(8) 0.071(10) 0.046(9) -0.017(8) 0.002(7) -0.018(8) 
C36 0.036(8) 0.072(11) 0.076(11) -0.003(9) -0.029(8) -0.030(8) 
C37 0.040(8) 0.046(9) 0.070(11) -0.001(8) -0.018(8) -0.018(7) 
C38 0.052(9) 0.053(10) 0.081(12) -0.018(10) -0.010(9) -0.017(8) 
C39 0.071(12) 0.061(12) 0.117(18) -0.030(12) -0.035(12) -0.006(10) 
C40 0.086(14) 0.068(13) 0.096(15) 0.005(12) -0.052(12) -0.008(11) 
C41 0.060(10) 0.056(10) 0.078(12) -0.015(10) -0.029(9) -0.010(9) 
C42 0.048(9) 0.044(9) 0.064(11) 0.010(8) -0.026(8) -0.020(7) 
C43 0.042(8) 0.057(10) 0.050(10) 0.000(8) -0.020(7) -0.022(8) 
O2 0.084(7) 0.066(7) 0.048(6) 0.005(6) -0.028(6) -0.028(6) 
C45 0.063(10) 0.073(11) 0.046(10) 0.002(9) -0.005(8) -0.036(9) 
C46 0.062(10) 0.064(10) 0.060(10) -0.011(9) -0.036(8) -0.007(9) 
C47 0.15(2) 0.111(16) 0.070(13) 0.007(12) -0.058(14) -0.072(15) 
C48 0.113(16) 0.081(13) 0.116(17) -0.042(13) -0.028(13) -0.018(12) 
C1 0.034(7) 0.058(9) 0.036(8) 0.005(7) -0.009(6) -0.023(7) 
C5 0.075(11) 0.070(11) 0.050(10) 0.002(8) -0.021(8) -0.036(9) 
C4 0.081(12) 0.064(11) 0.066(11) 0.001(10) -0.009(10) -0.040(10) 
C3 0.050(9) 0.080(12) 0.047(10) 0.005(9) 0.002(8) -0.020(9) 
C2 0.041(8) 0.074(11) 0.058(10) -0.016(9) -0.002(7) -0.019(8) 
C11 0.049(8) 0.060(9) 0.029(8) -0.004(7) -0.006(6) -0.020(7) 
C12 0.043(8) 0.035(8) 0.043(8) -0.006(6) -0.005(6) -0.013(7) 
C13 0.035(7) 0.039(8) 0.037(8) 0.000(6) -0.010(6) -0.018(6) 
C14 0.056(9) 0.066(10) 0.050(10) -0.023(8) 0.004(7) -0.029(8) 
C15 0.072(11) 0.084(13) 0.085(13) -0.054(11) 0.001(10) -0.020(11) 
C16 0.083(12) 0.062(11) 0.073(12) -0.005(10) -0.030(10) -0.038(10) 
C17 0.073(10) 0.071(11) 0.044(10) -0.011(8) -0.007(8) -0.025(8) 
C18 0.066(9) 0.024(7) 0.049(9) -0.002(7) -0.034(7) -0.001(7) 
C19 0.055(9) 0.038(8) 0.030(8) 0.000(6) -0.007(6) -0.023(7) 
C20 0.063(10) 0.079(12) 0.054(11) -0.010(10) 0.003(9) -0.027(9) 
C21 0.059(9) 0.057(9) 0.033(9) -0.007(7) 0.000(7) -0.020(8) 
C22 0.079(11) 0.068(11) 0.028(8) -0.005(8) 0.002(8) -0.030(9) 
C23 0.085(13) 0.092(14) 0.071(12) -0.016(11) -0.036(10) -0.002(11) 
C24 0.134(17) 0.071(12) 0.058(12) -0.013(10) 0.006(12) -0.027(12) 
C8 0.069(10) 0.20(2) 0.065(10) -0.012(12) -0.025(8) -0.058(12) 
C10 0.069(10) 0.20(2) 0.065(10) -0.012(12) -0.025(8) -0.058(12) 
C7 0.12(2) 0.052(15) 0.086(19) -0.009(12) -0.058(17) -0.022(13) 
C9 0.15(2) 0.119(17) 0.088(15) -0.042(15) -0.063(15) -0.050(16) 
C6 0.141(16) 0.121(15) 0.071(11) 0.021(11) -0.029(11) -0.090(14) 
  
_geom_special_details 
; 
 All esds (except the esd in the dihedral angle between two l.s. planes) 
 are estimated using the full covariance matrix.  The cell esds are taken 
 into account individually in the estimation of esds in distances, angles 
 and torsion angles; correlations between esds in cell parameters are only 
 used when they are defined by crystal symmetry.  An approximate (isotropic) 
 treatment of cell esds is used for estimating esds involving l.s. planes. 
; 
  
loop_ 
 _geom_bond_atom_site_label_1 
 _geom_bond_atom_site_label_2 
 _geom_bond_distance 
 _geom_bond_site_symmetry_2 
 _geom_bond_publ_flag 
O1 C19 1.340(14) . ? 
O1 C20 1.463(17) . ? 
C44 O2 1.431(17) . ? 
C44 C45 1.51(2) . ? 
C44 H44A 0.9700 . ? 
C44 H44B 0.9700 . ? 
N1 C19 1.278(16) . ? 
N1 C21 1.475(15) . ? 
N1 Cu1 1.971(11) . ? 
N2 C43 1.273(16) . ? 
N2 C45 1.486(19) . ? 
N2 Cu2 1.939(12) . ? 
Fe2 C26 1.992(15) . ? 
Fe2 C30 2.006(16) . ? 
Fe2 C29 2.016(15) . ? 
Fe2 C34 2.02(2) . ? 
Fe2 C27 2.018(15) . ? 
Fe2 C25 2.045(15) . ? 
Fe2 C32 2.050(19) . ? 
Fe2 C28 2.050(14) . ? 
Fe2 C31 2.052(17) . ? 
Fe2 C33 2.059(17) . ? 
Fe1 C9 2.000(17) . ? 
Fe1 C1 2.008(13) . ? 
Fe1 C2 2.019(16) . ? 
Fe1 C8 2.02(2) . ? 
Fe1 C5 2.025(17) . ? 
Fe1 C10 2.029(15) . ? 
Fe1 C4 2.042(17) . ? 
Fe1 C7 2.05(2) . ? 
Fe1 C3 2.060(15) . ? 
Fe1 C6 2.07(2) . ? 
Cu2 C36 1.921(16) . ? 
Cu2 C35 1.992(14) . ? 
Cu2 Br2 2.319(2) . ? 
Cu1 C12 1.927(12) . ? 
Cu1 C11 1.996(12) . ? 
Cu1 Br1 2.307(2) . ? 
C25 C26 1.411(18) . ? 
C25 C29 1.43(2) . ? 
C25 C35 1.43(2) . ? 
C29 C28 1.44(2) . ? 
C29 H29 0.9800 . ? 
C28 C27 1.37(2) . ? 
C28 H28 0.9800 . ? 
C27 C26 1.39(2) . ? 
C27 H27 0.9800 . ? 
C26 H26 0.9800 . ? 
C33 C34 1.37(3) . ? 
C33 C32 1.44(3) . ? 
C33 H33 0.9800 . ? 
C32 C31 1.35(3) . ? 
C32 H32 0.9800 . ? 
C31 C30 1.36(2) . ? 
C31 H31 0.9800 . ? 
C30 C34 1.45(3) . ? 
C30 H30 0.9800 . ? 
C34 H34 0.9800 . ? 
C35 C36 1.218(19) . ? 
C36 C37 1.41(2) . ? 
C37 C38 1.369(19) . ? 
C37 C42 1.41(2) . ? 
C38 C39 1.45(2) . ? 
C38 H38 0.9300 . ? 
C39 C40 1.32(3) . ? 
C39 H39 0.9300 . ? 
C40 C41 1.37(2) . ? 
C40 H40 0.9300 . ? 
C41 C42 1.391(19) . ? 
C41 H41 0.9300 . ? 
C42 C43 1.44(2) . ? 
C43 O2 1.351(17) . ? 
C45 C46 1.50(2) . ? 
C45 H45 0.9800 . ? 
C46 C47 1.49(2) . ? 
C46 C48 1.50(2) . ? 
C46 H46 0.9800 . ? 
C47 H47A 0.9600 . ? 
C47 H47B 0.9600 . ? 
C47 H47C 0.9600 . ? 
C48 H48A 0.9600 . ? 
C48 H48B 0.9600 . ? 
C48 H48C 0.9600 . ? 
C1 C2 1.409(17) . ? 
C1 C5 1.42(2) . ? 
C1 C11 1.438(18) . ? 
C5 C4 1.42(2) . ? 
C5 H5 0.9800 . ? 
C4 C3 1.35(2) . ? 
C4 H4 0.9800 . ? 
C3 C2 1.45(2) . ? 
C3 H3 0.9800 . ? 
C2 H2 0.9800 . ? 
C11 C12 1.261(17) . ? 
C12 C13 1.404(17) . ? 
C13 C14 1.373(16) . ? 
C13 C18 1.400(18) . ? 
C14 C15 1.38(2) . ? 
C14 H14 0.9300 . ? 
C15 C16 1.36(2) . ? 
C15 H15 0.9300 . ? 
C16 C17 1.37(2) . ? 
C16 H16 0.9300 . ? 
C17 C18 1.37(2) . ? 
C17 H17 0.9300 . ? 
C18 C19 1.455(17) . ? 
C20 C21 1.56(2) . ? 
C20 H20A 0.9700 . ? 
C20 H20B 0.9700 . ? 
C21 C22 1.46(2) . ? 
C21 H21 0.9800 . ? 
C22 C23 1.52(2) . ? 
C22 C24 1.555(19) . ? 
C22 H22 0.9800 . ? 
C23 H23A 0.9600 . ? 
C23 H23B 0.9600 . ? 
C23 H23C 0.9600 . ? 
C24 H24A 0.9600 . ? 
C24 H24B 0.9600 . ? 
C24 H24C 0.9600 . ? 
C8 C7 1.30(3) . ? 
C8 C9 1.34(3) . ? 
C8 H8 0.9300 . ? 
C10 C6 1.33(3) . ? 
C10 C9 1.47(3) . ? 
C10 H10 0.9300 . ? 
C7 C6 1.27(3) . ? 
C7 H7 0.9300 . ? 
C9 H9 0.9300 . ? 
C6 H6 0.9300 . ? 
  
loop_ 
 _geom_angle_atom_site_label_1 
 _geom_angle_atom_site_label_2 
 _geom_angle_atom_site_label_3 
 _geom_angle 
 _geom_angle_site_symmetry_1 
 _geom_angle_site_symmetry_3 
 _geom_angle_publ_flag 
C19 O1 C20 106.5(11) . . ? 
O2 C44 C45 104.7(14) . . ? 
O2 C44 H44A 110.8 . . ? 
C45 C44 H44A 110.8 . . ? 
O2 C44 H44B 110.8 . . ? 
C45 C44 H44B 110.8 . . ? 
H44A C44 H44B 108.9 . . ? 
C19 N1 C21 111.7(11) . . ? 
C19 N1 Cu1 123.6(9) . . ? 
C21 N1 Cu1 124.5(9) . . ? 
C43 N2 C45 108.5(12) . . ? 
C43 N2 Cu2 125.9(11) . . ? 
C45 N2 Cu2 125.6(11) . . ? 
C26 Fe2 C30 120.1(7) . . ? 
C26 Fe2 C29 67.6(7) . . ? 
C30 Fe2 C29 164.1(9) . . ? 
C26 Fe2 C34 108.7(8) . . ? 
C30 Fe2 C34 42.4(8) . . ? 
C29 Fe2 C34 152.1(9) . . ? 
C26 Fe2 C27 40.6(6) . . ? 
C30 Fe2 C27 107.8(7) . . ? 
C29 Fe2 C27 68.1(7) . . ? 
C34 Fe2 C27 128.2(10) . . ? 
C26 Fe2 C25 40.9(5) . . ? 
C30 Fe2 C25 153.5(8) . . ? 
C29 Fe2 C25 41.2(6) . . ? 
C34 Fe2 C25 117.3(8) . . ? 
C27 Fe2 C25 69.7(6) . . ? 
C26 Fe2 C32 166.1(9) . . ? 
C30 Fe2 C32 66.8(8) . . ? 
C29 Fe2 C32 109.2(8) . . ? 
C34 Fe2 C32 67.5(9) . . ? 
C27 Fe2 C32 152.2(9) . . ? 
C25 Fe2 C32 127.7(9) . . ? 
C26 Fe2 C28 67.4(7) . . ? 
C30 Fe2 C28 125.7(9) . . ? 
C29 Fe2 C28 41.6(6) . . ? 
C34 Fe2 C28 164.9(10) . . ? 
C27 Fe2 C28 39.4(6) . . ? 
C25 Fe2 C28 70.1(7) . . ? 
C32 Fe2 C28 119.8(9) . . ? 
C26 Fe2 C31 154.0(8) . . ? 
C30 Fe2 C31 39.0(7) . . ? 
C29 Fe2 C31 128.6(9) . . ? 
C34 Fe2 C31 67.1(9) . . ? 
C27 Fe2 C31 120.3(7) . . ? 
C25 Fe2 C31 164.7(8) . . ? 
C32 Fe2 C31 38.4(7) . . ? 
C28 Fe2 C31 109.6(8) . . ? 
C26 Fe2 C33 127.4(8) . . ? 
C30 Fe2 C33 68.5(8) . . ? 
C29 Fe2 C33 119.4(8) . . ? 
C34 Fe2 C33 39.4(8) . . ? 
C27 Fe2 C33 165.0(9) . . ? 
C25 Fe2 C33 106.7(7) . . ? 
C32 Fe2 C33 41.2(8) . . ? 
C28 Fe2 C33 154.5(9) . . ? 
C31 Fe2 C33 66.6(8) . . ? 
C9 Fe1 C1 143.0(9) . . ? 
C9 Fe1 C2 174.8(9) . . ? 
C1 Fe1 C2 41.0(5) . . ? 
C9 Fe1 C8 38.9(8) . . ? 
C1 Fe1 C8 173.8(11) . . ? 
C2 Fe1 C8 136.6(9) . . ? 
C9 Fe1 C5 115.6(9) . . ? 
C1 Fe1 C5 41.2(6) . . ? 
C2 Fe1 C5 69.7(6) . . ? 
C8 Fe1 C5 144.8(11) . . ? 
C9 Fe1 C10 42.8(8) . . ? 
C1 Fe1 C10 110.6(7) . . ? 
C2 Fe1 C10 136.2(9) . . ? 
C8 Fe1 C10 67.2(8) . . ? 
C5 Fe1 C10 112.7(8) . . ? 
C9 Fe1 C4 116.1(8) . . ? 
C1 Fe1 C4 67.6(6) . . ? 
C2 Fe1 C4 67.7(7) . . ? 
C8 Fe1 C4 117.8(9) . . ? 
C5 Fe1 C4 40.9(6) . . ? 
C10 Fe1 C4 143.6(10) . . ? 
C9 Fe1 C7 63.0(9) . . ? 
C1 Fe1 C7 136.7(7) . . ? 
C2 Fe1 C7 111.8(7) . . ? 
C8 Fe1 C7 37.2(9) . . ? 
C5 Fe1 C7 174.6(9) . . ? 
C10 Fe1 C7 62.5(10) . . ? 
C4 Fe1 C7 144.5(9) . . ? 
C9 Fe1 C3 139.2(9) . . ? 
C1 Fe1 C3 68.4(6) . . ? 
C2 Fe1 C3 41.6(6) . . ? 
C8 Fe1 C3 113.6(7) . . ? 
C5 Fe1 C3 68.2(6) . . ? 
C10 Fe1 C3 177.5(11) . . ? 
C4 Fe1 C3 38.5(6) . . ? 
C7 Fe1 C3 116.5(8) . . ? 
C9 Fe1 C6 65.9(10) . . ? 
C1 Fe1 C6 110.8(8) . . ? 
C2 Fe1 C6 110.3(9) . . ? 
C8 Fe1 C6 63.8(11) . . ? 
C5 Fe1 C6 138.7(10) . . ? 
C10 Fe1 C6 37.8(9) . . ? 
C4 Fe1 C6 178.0(10) . . ? 
C7 Fe1 C6 36.0(10) . . ? 
C3 Fe1 C6 140.1(11) . . ? 
C36 Cu2 N2 93.8(6) . . ? 
C36 Cu2 C35 36.2(6) . . ? 
N2 Cu2 C35 130.0(6) . . ? 
C36 Cu2 Br2 155.9(5) . . ? 
N2 Cu2 Br2 110.2(4) . . ? 
C35 Cu2 Br2 119.8(5) . . ? 
C12 Cu1 N1 95.2(5) . . ? 
C12 Cu1 C11 37.4(5) . . ? 
N1 Cu1 C11 132.6(5) . . ? 
C12 Cu1 Br1 153.0(4) . . ? 
N1 Cu1 Br1 111.8(3) . . ? 
C11 Cu1 Br1 115.5(4) . . ? 
C26 C25 C29 103.3(14) . . ? 
C26 C25 C35 131.8(14) . . ? 
C29 C25 C35 124.7(14) . . ? 
C26 C25 Fe2 67.6(8) . . ? 
C29 C25 Fe2 68.3(9) . . ? 
C35 C25 Fe2 123.4(10) . . ? 
C25 C29 C28 109.8(15) . . ? 
C25 C29 Fe2 70.5(8) . . ? 
C28 C29 Fe2 70.5(8) . . ? 
C25 C29 H29 125.1 . . ? 
C28 C29 H29 125.1 . . ? 
Fe2 C29 H29 125.1 . . ? 
C27 C28 C29 106.6(16) . . ? 
C27 C28 Fe2 69.0(8) . . ? 
C29 C28 Fe2 67.9(9) . . ? 
C27 C28 H28 126.7 . . ? 
C29 C28 H28 126.7 . . ? 
Fe2 C28 H28 126.7 . . ? 
C28 C27 C26 108.5(15) . . ? 
C28 C27 Fe2 71.5(9) . . ? 
C26 C27 Fe2 68.7(8) . . ? 
C28 C27 H27 125.8 . . ? 
C26 C27 H27 125.8 . . ? 
Fe2 C27 H27 125.8 . . ? 
C27 C26 C25 111.8(14) . . ? 
C27 C26 Fe2 70.7(9) . . ? 
C25 C26 Fe2 71.6(8) . . ? 
C27 C26 H26 124.1 . . ? 
C25 C26 H26 124.1 . . ? 
Fe2 C26 H26 124.1 . . ? 
C34 C33 C32 106.5(19) . . ? 
C34 C33 Fe2 68.7(11) . . ? 
C32 C33 Fe2 69.1(11) . . ? 
C34 C33 H33 126.7 . . ? 
C32 C33 H33 126.7 . . ? 
Fe2 C33 H33 126.7 . . ? 
C31 C32 C33 107.9(18) . . ? 
C31 C32 Fe2 70.9(11) . . ? 
C33 C32 Fe2 69.8(10) . . ? 
C31 C32 H32 126.1 . . ? 
C33 C32 H32 126.1 . . ? 
Fe2 C32 H32 126.1 . . ? 
C32 C31 C30 111.3(19) . . ? 
C32 C31 Fe2 70.8(12) . . ? 
C30 C31 Fe2 68.7(10) . . ? 
C32 C31 H31 124.3 . . ? 
C30 C31 H31 124.3 . . ? 
Fe2 C31 H31 124.3 . . ? 
C31 C30 C34 106.3(19) . . ? 
C31 C30 Fe2 72.3(10) . . ? 
C34 C30 Fe2 69.3(10) . . ? 
C31 C30 H30 126.7 . . ? 
C34 C30 H30 126.8 . . ? 
Fe2 C30 H30 126.8 . . ? 
C33 C34 C30 108(2) . . ? 
C33 C34 Fe2 71.9(13) . . ? 
C30 C34 Fe2 68.3(10) . . ? 
C33 C34 H34 126.1 . . ? 
C30 C34 H34 126.0 . . ? 
Fe2 C34 H34 126.1 . . ? 
C36 C35 C25 164.5(15) . . ? 
C36 C35 Cu2 68.7(11) . . ? 
C25 C35 Cu2 126.7(11) . . ? 
C35 C36 C37 158.3(16) . . ? 
C35 C36 Cu2 75.0(11) . . ? 
C37 C36 Cu2 126.4(12) . . ? 
C38 C37 C42 118.7(15) . . ? 
C38 C37 C36 118.9(15) . . ? 
C42 C37 C36 122.4(14) . . ? 
C37 C38 C39 120.1(17) . . ? 
C37 C38 H38 120.0 . . ? 
C39 C38 H38 120.0 . . ? 
C40 C39 C38 120.4(19) . . ? 
C40 C39 H39 119.8 . . ? 
C38 C39 H39 119.8 . . ? 
C39 C40 C41 119.7(18) . . ? 
C39 C40 H40 120.1 . . ? 
C41 C40 H40 120.1 . . ? 
C40 C41 C42 122.5(16) . . ? 
C40 C41 H41 118.8 . . ? 
C42 C41 H41 118.8 . . ? 
C41 C42 C37 118.5(15) . . ? 
C41 C42 C43 118.2(14) . . ? 
C37 C42 C43 123.1(13) . . ? 
N2 C43 O2 115.1(13) . . ? 
N2 C43 C42 127.9(14) . . ? 
O2 C43 C42 117.0(14) . . ? 
C43 O2 C44 107.3(13) . . ? 
N2 C45 C46 112.3(12) . . ? 
N2 C45 C44 102.0(12) . . ? 
C46 C45 C44 113.3(14) . . ? 
N2 C45 H45 109.6 . . ? 
C46 C45 H45 109.6 . . ? 
C44 C45 H45 109.6 . . ? 
C47 C46 C45 115.3(14) . . ? 
C47 C46 C48 109.4(15) . . ? 
C45 C46 C48 111.5(14) . . ? 
C47 C46 H46 106.7 . . ? 
C45 C46 H46 106.7 . . ? 
C48 C46 H46 106.7 . . ? 
C46 C47 H47A 109.5 . . ? 
C46 C47 H47B 109.5 . . ? 
H47A C47 H47B 109.5 . . ? 
C46 C47 H47C 109.5 . . ? 
H47A C47 H47C 109.5 . . ? 
H47B C47 H47C 109.5 . . ? 
C46 C48 H48A 109.5 . . ? 
C46 C48 H48B 109.5 . . ? 
H48A C48 H48B 109.5 . . ? 
C46 C48 H48C 109.5 . . ? 
H48A C48 H48C 109.5 . . ? 
H48B C48 H48C 109.5 . . ? 
C2 C1 C5 109.5(13) . . ? 
C2 C1 C11 123.6(13) . . ? 
C5 C1 C11 126.5(12) . . ? 
C2 C1 Fe1 70.0(8) . . ? 
C5 C1 Fe1 70.1(9) . . ? 
C11 C1 Fe1 120.9(9) . . ? 
C4 C5 C1 105.1(14) . . ? 
C4 C5 Fe1 70.2(10) . . ? 
C1 C5 Fe1 68.7(8) . . ? 
C4 C5 H5 127.4 . . ? 
C1 C5 H5 127.4 . . ? 
Fe1 C5 H5 127.4 . . ? 
C3 C4 C5 111.4(15) . . ? 
C3 C4 Fe1 71.5(10) . . ? 
C5 C4 Fe1 68.9(9) . . ? 
C3 C4 H4 124.2 . . ? 
C5 C4 H4 124.2 . . ? 
Fe1 C4 H4 124.2 . . ? 
C4 C3 C2 107.6(12) . . ? 
C4 C3 Fe1 70.0(10) . . ? 
C2 C3 Fe1 67.7(8) . . ? 
C4 C3 H3 126.2 . . ? 
C2 C3 H3 126.2 . . ? 
Fe1 C3 H3 126.2 . . ? 
C1 C2 C3 106.3(13) . . ? 
C1 C2 Fe1 69.1(8) . . ? 
C3 C2 Fe1 70.7(9) . . ? 
C1 C2 H2 126.9 . . ? 
C3 C2 H2 126.9 . . ? 
Fe1 C2 H2 126.9 . . ? 
C12 C11 C1 160.3(13) . . ? 
C12 C11 Cu1 68.3(8) . . ? 
C1 C11 Cu1 131.4(10) . . ? 
C11 C12 C13 160.4(13) . . ? 
C11 C12 Cu1 74.3(8) . . ? 
C13 C12 Cu1 125.3(9) . . ? 
C14 C13 C18 116.3(11) . . ? 
C14 C13 C12 120.0(11) . . ? 
C18 C13 C12 123.6(12) . . ? 
C13 C14 C15 124.0(13) . . ? 
C13 C14 H14 118.0 . . ? 
C15 C14 H14 118.0 . . ? 
C16 C15 C14 118.1(14) . . ? 
C16 C15 H15 121.0 . . ? 
C14 C15 H15 120.9 . . ? 
C15 C16 C17 120.0(15) . . ? 
C15 C16 H16 120.0 . . ? 
C17 C16 H16 120.0 . . ? 
C18 C17 C16 121.3(15) . . ? 
C18 C17 H17 119.4 . . ? 
C16 C17 H17 119.4 . . ? 
C17 C18 C13 120.3(13) . . ? 
C17 C18 C19 116.2(14) . . ? 
C13 C18 C19 123.5(11) . . ? 
N1 C19 O1 115.2(12) . . ? 
N1 C19 C18 128.4(11) . . ? 
O1 C19 C18 116.4(11) . . ? 
O1 C20 C21 105.2(11) . . ? 
O1 C20 H20A 110.7 . . ? 
C21 C20 H20A 110.7 . . ? 
O1 C20 H20B 110.7 . . ? 
C21 C20 H20B 110.7 . . ? 
H20A C20 H20B 108.8 . . ? 
C22 C21 N1 111.9(12) . . ? 
C22 C21 C20 116.0(13) . . ? 
N1 C21 C20 99.8(11) . . ? 
C22 C21 H21 109.6 . . ? 
N1 C21 H21 109.6 . . ? 
C20 C21 H21 109.6 . . ? 
C21 C22 C23 113.1(13) . . ? 
C21 C22 C24 112.8(14) . . ? 
C23 C22 C24 108.4(13) . . ? 
C21 C22 H22 107.4 . . ? 
C23 C22 H22 107.4 . . ? 
C24 C22 H22 107.4 . . ? 
C22 C23 H23A 109.5 . . ? 
C22 C23 H23B 109.5 . . ? 
H23A C23 H23B 109.5 . . ? 
C22 C23 H23C 109.5 . . ? 
H23A C23 H23C 109.5 . . ? 
H23B C23 H23C 109.5 . . ? 
C22 C24 H24A 109.5 . . ? 
C22 C24 H24B 109.5 . . ? 
H24A C24 H24B 109.5 . . ? 
C22 C24 H24C 109.5 . . ? 
H24A C24 H24C 109.5 . . ? 
H24B C24 H24C 109.5 . . ? 
C7 C8 C9 107(2) . . ? 
C7 C8 Fe1 72.3(14) . . ? 
C9 C8 Fe1 69.6(11) . . ? 
C7 C8 H8 126.7 . . ? 
C9 C8 H8 126.7 . . ? 
Fe1 C8 H8 123.0 . . ? 
C6 C10 C9 104.4(19) . . ? 
C6 C10 Fe1 72.8(13) . . ? 
C9 C10 Fe1 67.6(9) . . ? 
C6 C10 H10 127.8 . . ? 
C9 C10 H10 127.8 . . ? 
Fe1 C10 H10 123.6 . . ? 
C6 C7 C8 115(3) . . ? 
C6 C7 Fe1 73.0(17) . . ? 
C8 C7 Fe1 70.5(13) . . ? 
C6 C7 H7 122.7 . . ? 
C8 C7 H7 122.7 . . ? 
Fe1 C7 H7 125.4 . . ? 
C8 C9 C10 106(2) . . ? 
C8 C9 Fe1 71.5(12) . . ? 
C10 C9 Fe1 69.6(9) . . ? 
C8 C9 H9 127.2 . . ? 
C10 C9 H9 127.2 . . ? 
Fe1 C9 H9 123.4 . . ? 
C7 C6 C10 109(2) . . ? 
C7 C6 Fe1 71.0(14) . . ? 
C10 C6 Fe1 69.4(14) . . ? 
C7 C6 H6 125.6 . . ? 
C10 C6 H6 125.6 . . ? 
Fe1 C6 H6 125.5 . . ? 
  
loop_ 
 _geom_torsion_atom_site_label_1 
 _geom_torsion_atom_site_label_2 
 _geom_torsion_atom_site_label_3 
 _geom_torsion_atom_site_label_4 
 _geom_torsion 
 _geom_torsion_site_symmetry_1 
 _geom_torsion_site_symmetry_2 
 _geom_torsion_site_symmetry_3 
 _geom_torsion_site_symmetry_4 
 _geom_torsion_publ_flag 
C43 N2 Cu2 C36 6.8(13) . . . . ? 
C45 N2 Cu2 C36 -171.6(11) . . . . ? 
C43 N2 Cu2 C35 6.7(15) . . . . ? 
C45 N2 Cu2 C35 -171.7(10) . . . . ? 
C43 N2 Cu2 Br2 -170.4(11) . . . . ? 
C45 N2 Cu2 Br2 11.2(11) . . . . ? 
C19 N1 Cu1 C12 3.8(12) . . . . ? 
C21 N1 Cu1 C12 178.2(11) . . . . ? 
C19 N1 Cu1 C11 5.4(14) . . . . ? 
C21 N1 Cu1 C11 179.8(10) . . . . ? 
C19 N1 Cu1 Br1 -176.7(10) . . . . ? 
C21 N1 Cu1 Br1 -2.2(11) . . . . ? 
C30 Fe2 C25 C26 53.4(19) . . . . ? 
C29 Fe2 C25 C26 -115.6(13) . . . . ? 
C34 Fe2 C25 C26 87.4(12) . . . . ? 
C27 Fe2 C25 C26 -36.0(8) . . . . ? 
C32 Fe2 C25 C26 169.0(10) . . . . ? 
C28 Fe2 C25 C26 -78.2(10) . . . . ? 
C31 Fe2 C25 C26 -170(3) . . . . ? 
C33 Fe2 C25 C26 128.5(11) . . . . ? 
C26 Fe2 C25 C29 115.6(13) . . . . ? 
C30 Fe2 C25 C29 169.0(16) . . . . ? 
C34 Fe2 C25 C29 -157.0(12) . . . . ? 
C27 Fe2 C25 C29 79.6(10) . . . . ? 
C32 Fe2 C25 C29 -75.4(13) . . . . ? 
C28 Fe2 C25 C29 37.5(10) . . . . ? 
C31 Fe2 C25 C29 -54(3) . . . . ? 
C33 Fe2 C25 C29 -115.8(12) . . . . ? 
C26 Fe2 C25 C35 -126.2(16) . . . . ? 
C30 Fe2 C25 C35 -73(2) . . . . ? 
C29 Fe2 C25 C35 118.1(16) . . . . ? 
C34 Fe2 C25 C35 -38.8(16) . . . . ? 
C27 Fe2 C25 C35 -162.3(14) . . . . ? 
C32 Fe2 C25 C35 42.7(16) . . . . ? 
C28 Fe2 C25 C35 155.6(15) . . . . ? 
C31 Fe2 C25 C35 64(3) . . . . ? 
C33 Fe2 C25 C35 2.3(15) . . . . ? 
C26 C25 C29 C28 -0.8(17) . . . . ? 
C35 C25 C29 C28 -176.2(14) . . . . ? 
Fe2 C25 C29 C28 -59.7(12) . . . . ? 
C26 C25 C29 Fe2 58.9(9) . . . . ? 
C35 C25 C29 Fe2 -116.5(14) . . . . ? 
C26 Fe2 C29 C25 -39.7(9) . . . . ? 
C30 Fe2 C29 C25 -162(3) . . . . ? 
C34 Fe2 C29 C25 48(2) . . . . ? 
C27 Fe2 C29 C25 -83.7(10) . . . . ? 
C32 Fe2 C29 C25 125.8(11) . . . . ? 
C28 Fe2 C29 C25 -120.5(16) . . . . ? 
C31 Fe2 C29 C25 164.2(10) . . . . ? 
C33 Fe2 C29 C25 81.8(12) . . . . ? 
C26 Fe2 C29 C28 80.8(12) . . . . ? 
C30 Fe2 C29 C28 -41(3) . . . . ? 
C34 Fe2 C29 C28 168.5(19) . . . . ? 
C27 Fe2 C29 C28 36.8(11) . . . . ? 
C25 Fe2 C29 C28 120.5(16) . . . . ? 
C32 Fe2 C29 C28 -113.7(14) . . . . ? 
C31 Fe2 C29 C28 -75.3(15) . . . . ? 
C33 Fe2 C29 C28 -157.7(13) . . . . ? 
C25 C29 C28 C27 1.3(19) . . . . ? 
Fe2 C29 C28 C27 -58.4(11) . . . . ? 
C25 C29 C28 Fe2 59.7(11) . . . . ? 
C26 Fe2 C28 C27 38.0(10) . . . . ? 
C30 Fe2 C28 C27 -73.8(14) . . . . ? 
C29 Fe2 C28 C27 119.1(16) . . . . ? 
C34 Fe2 C28 C27 -40(4) . . . . ? 
C25 Fe2 C28 C27 81.9(11) . . . . ? 
C32 Fe2 C28 C27 -155.3(12) . . . . ? 
C31 Fe2 C28 C27 -114.3(12) . . . . ? 
C33 Fe2 C28 C27 169.1(17) . . . . ? 
C26 Fe2 C28 C29 -81.1(12) . . . . ? 
C30 Fe2 C28 C29 167.1(12) . . . . ? 
C34 Fe2 C28 C29 -159(3) . . . . ? 
C27 Fe2 C28 C29 -119.1(16) . . . . ? 
C25 Fe2 C28 C29 -37.2(11) . . . . ? 
C32 Fe2 C28 C29 85.7(15) . . . . ? 
C31 Fe2 C28 C29 126.6(13) . . . . ? 
C33 Fe2 C28 C29 50(2) . . . . ? 
C29 C28 C27 C26 -1.2(19) . . . . ? 
Fe2 C28 C27 C26 -59.0(11) . . . . ? 
C29 C28 C27 Fe2 57.7(11) . . . . ? 
C26 Fe2 C27 C28 -119.3(14) . . . . ? 
C30 Fe2 C27 C28 125.0(12) . . . . ? 
C29 Fe2 C27 C28 -38.7(11) . . . . ? 
C34 Fe2 C27 C28 167.7(12) . . . . ? 
C25 Fe2 C27 C28 -83.0(11) . . . . ? 
C32 Fe2 C27 C28 51(2) . . . . ? 
C31 Fe2 C27 C28 84.2(14) . . . . ? 
C33 Fe2 C27 C28 -162(3) . . . . ? 
C30 Fe2 C27 C26 -115.8(11) . . . . ? 
C29 Fe2 C27 C26 80.6(10) . . . . ? 
C34 Fe2 C27 C26 -73.0(13) . . . . ? 
C25 Fe2 C27 C26 36.2(8) . . . . ? 
C32 Fe2 C27 C26 170.4(16) . . . . ? 
C28 Fe2 C27 C26 119.3(14) . . . . ? 
C31 Fe2 C27 C26 -156.5(11) . . . . ? 
C33 Fe2 C27 C26 -42(3) . . . . ? 
C28 C27 C26 C25 0.8(18) . . . . ? 
Fe2 C27 C26 C25 -59.9(10) . . . . ? 
C28 C27 C26 Fe2 60.7(11) . . . . ? 
C29 C25 C26 C27 0.0(16) . . . . ? 
C35 C25 C26 C27 174.9(15) . . . . ? 
Fe2 C25 C26 C27 59.4(11) . . . . ? 
C29 C25 C26 Fe2 -59.4(10) . . . . ? 
C35 C25 C26 Fe2 115.5(16) . . . . ? 
C30 Fe2 C26 C27 82.4(12) . . . . ? 
C29 Fe2 C26 C27 -82.1(10) . . . . ? 
C34 Fe2 C26 C27 127.5(12) . . . . ? 
C25 Fe2 C26 C27 -122.1(12) . . . . ? 
C32 Fe2 C26 C27 -161(3) . . . . ? 
C28 Fe2 C26 C27 -36.9(9) . . . . ? 
C31 Fe2 C26 C27 52(2) . . . . ? 
C33 Fe2 C26 C27 167.3(11) . . . . ? 
C30 Fe2 C26 C25 -155.5(11) . . . . ? 
C29 Fe2 C26 C25 40.0(8) . . . . ? 
C34 Fe2 C26 C25 -110.4(11) . . . . ? 
C27 Fe2 C26 C25 122.1(12) . . . . ? 
C32 Fe2 C26 C25 -39(3) . . . . ? 
C28 Fe2 C26 C25 85.2(9) . . . . ? 
C31 Fe2 C26 C25 173.8(16) . . . . ? 
C33 Fe2 C26 C25 -70.7(12) . . . . ? 
C26 Fe2 C33 C34 -72.7(15) . . . . ? 
C30 Fe2 C33 C34 39.5(13) . . . . ? 
C29 Fe2 C33 C34 -155.8(13) . . . . ? 
C27 Fe2 C33 C34 -39(3) . . . . ? 
C25 Fe2 C33 C34 -112.8(13) . . . . ? 
C32 Fe2 C33 C34 118.4(19) . . . . ? 
C28 Fe2 C33 C34 168.5(17) . . . . ? 
C31 Fe2 C33 C34 81.8(14) . . . . ? 
C26 Fe2 C33 C32 169.0(12) . . . . ? 
C30 Fe2 C33 C32 -78.9(13) . . . . ? 
C29 Fe2 C33 C32 85.9(15) . . . . ? 
C34 Fe2 C33 C32 -118.4(19) . . . . ? 
C27 Fe2 C33 C32 -157(3) . . . . ? 
C25 Fe2 C33 C32 128.8(14) . . . . ? 
C28 Fe2 C33 C32 50(2) . . . . ? 
C31 Fe2 C33 C32 -36.5(13) . . . . ? 
C34 C33 C32 C31 2(2) . . . . ? 
Fe2 C33 C32 C31 60.9(15) . . . . ? 
C34 C33 C32 Fe2 -58.8(13) . . . . ? 
C26 Fe2 C32 C31 -157(3) . . . . ? 
C30 Fe2 C32 C31 -34.9(14) . . . . ? 
C29 Fe2 C32 C31 128.6(14) . . . . ? 
C34 Fe2 C32 C31 -81.1(14) . . . . ? 
C27 Fe2 C32 C31 49(2) . . . . ? 
C25 Fe2 C32 C31 171.1(12) . . . . ? 
C28 Fe2 C32 C31 84.1(15) . . . . ? 
C33 Fe2 C32 C31 -118.3(19) . . . . ? 
C26 Fe2 C32 C33 -39(4) . . . . ? 
C30 Fe2 C32 C33 83.4(13) . . . . ? 
C29 Fe2 C32 C33 -113.1(14) . . . . ? 
C34 Fe2 C32 C33 37.2(12) . . . . ? 
C27 Fe2 C32 C33 167.6(15) . . . . ? 
C25 Fe2 C32 C33 -70.6(15) . . . . ? 
C28 Fe2 C32 C33 -157.6(12) . . . . ? 
C31 Fe2 C32 C33 118.3(19) . . . . ? 
C33 C32 C31 C30 -4(2) . . . . ? 
Fe2 C32 C31 C30 56.7(14) . . . . ? 
C33 C32 C31 Fe2 -60.2(14) . . . . ? 
C26 Fe2 C31 C32 167.9(15) . . . . ? 
C30 Fe2 C31 C32 123(2) . . . . ? 
C29 Fe2 C31 C32 -70.7(16) . . . . ? 
C34 Fe2 C31 C32 82.1(14) . . . . ? 
C27 Fe2 C31 C32 -155.8(12) . . . . ? 
C25 Fe2 C31 C32 -28(3) . . . . ? 
C28 Fe2 C31 C32 -113.7(14) . . . . ? 
C33 Fe2 C31 C32 39.1(13) . . . . ? 
C26 Fe2 C31 C30 45(2) . . . . ? 
C29 Fe2 C31 C30 165.9(13) . . . . ? 
C34 Fe2 C31 C30 -41.2(14) . . . . ? 
C27 Fe2 C31 C30 80.9(15) . . . . ? 
C25 Fe2 C31 C30 -151(3) . . . . ? 
C32 Fe2 C31 C30 -123(2) . . . . ? 
C28 Fe2 C31 C30 123.0(14) . . . . ? 
C33 Fe2 C31 C30 -84.2(14) . . . . ? 
C32 C31 C30 C34 3(2) . . . . ? 
Fe2 C31 C30 C34 61.3(12) . . . . ? 
C32 C31 C30 Fe2 -57.9(16) . . . . ? 
C26 Fe2 C30 C31 -159.2(11) . . . . ? 
C29 Fe2 C30 C31 -44(3) . . . . ? 
C34 Fe2 C30 C31 115.8(18) . . . . ? 
C27 Fe2 C30 C31 -116.5(13) . . . . ? 
C25 Fe2 C30 C31 163.4(14) . . . . ? 
C32 Fe2 C30 C31 34.4(12) . . . . ? 
C28 Fe2 C30 C31 -76.6(15) . . . . ? 
C33 Fe2 C30 C31 79.0(13) . . . . ? 
C26 Fe2 C30 C34 85.0(15) . . . . ? 
C29 Fe2 C30 C34 -160(3) . . . . ? 
C27 Fe2 C30 C34 127.7(14) . . . . ? 
C25 Fe2 C30 C34 48(2) . . . . ? 
C32 Fe2 C30 C34 -81.5(14) . . . . ? 
C28 Fe2 C30 C34 167.5(14) . . . . ? 
C31 Fe2 C30 C34 -115.8(18) . . . . ? 
C33 Fe2 C30 C34 -36.8(13) . . . . ? 
C32 C33 C34 C30 0(2) . . . . ? 
Fe2 C33 C34 C30 -59.1(12) . . . . ? 
C32 C33 C34 Fe2 59.0(13) . . . . ? 
C31 C30 C34 C33 -2(2) . . . . ? 
Fe2 C30 C34 C33 61.3(13) . . . . ? 
C31 C30 C34 Fe2 -63.3(13) . . . . ? 
C26 Fe2 C34 C33 126.9(13) . . . . ? 
C30 Fe2 C34 C33 -118.5(19) . . . . ? 
C29 Fe2 C34 C33 50(2) . . . . ? 
C27 Fe2 C34 C33 168.0(12) . . . . ? 
C25 Fe2 C34 C33 83.3(14) . . . . ? 
C32 Fe2 C34 C33 -38.8(13) . . . . ? 
C28 Fe2 C34 C33 -161(3) . . . . ? 
C31 Fe2 C34 C33 -80.6(13) . . . . ? 
C26 Fe2 C34 C30 -114.6(13) . . . . ? 
C29 Fe2 C34 C30 168.3(16) . . . . ? 
C27 Fe2 C34 C30 -73.5(15) . . . . ? 
C25 Fe2 C34 C30 -158.2(11) . . . . ? 
C32 Fe2 C34 C30 79.7(13) . . . . ? 
C28 Fe2 C34 C30 -42(4) . . . . ? 
C31 Fe2 C34 C30 38.0(11) . . . . ? 
C33 Fe2 C34 C30 118.5(19) . . . . ? 
C26 C25 C35 C36 -175(5) . . . . ? 
C29 C25 C35 C36 -1(6) . . . . ? 
Fe2 C25 C35 C36 -86(6) . . . . ? 
C26 C25 C35 Cu2 10(2) . . . . ? 
C29 C25 C35 Cu2 -175.7(11) . . . . ? 
Fe2 C25 C35 Cu2 99.0(14) . . . . ? 
N2 Cu2 C35 C36 0.3(12) . . . . ? 
Br2 Cu2 C35 C36 177.1(8) . . . . ? 
C36 Cu2 C35 C25 178.4(18) . . . . ? 
N2 Cu2 C35 C25 178.7(10) . . . . ? 
Br2 Cu2 C35 C25 -4.5(14) . . . . ? 
C25 C35 C36 C37 14(9) . . . . ? 
Cu2 C35 C36 C37 -171(4) . . . . ? 
C25 C35 C36 Cu2 -175(6) . . . . ? 
N2 Cu2 C36 C35 -179.8(9) . . . . ? 
Br2 Cu2 C36 C35 -6.2(17) . . . . ? 
N2 Cu2 C36 C37 -3.9(12) . . . . ? 
C35 Cu2 C36 C37 175.9(18) . . . . ? 
Br2 Cu2 C36 C37 169.7(7) . . . . ? 
C35 C36 C37 C38 -9(4) . . . . ? 
Cu2 C36 C37 C38 -178.4(10) . . . . ? 
C35 C36 C37 C42 168(3) . . . . ? 
Cu2 C36 C37 C42 -1.4(19) . . . . ? 
C42 C37 C38 C39 4(2) . . . . ? 
C36 C37 C38 C39 -179.0(13) . . . . ? 
C37 C38 C39 C40 -5(3) . . . . ? 
C38 C39 C40 C41 3(3) . . . . ? 
C39 C40 C41 C42 0(3) . . . . ? 
C40 C41 C42 C37 0(2) . . . . ? 
C40 C41 C42 C43 175.5(15) . . . . ? 
C38 C37 C42 C41 -1.4(19) . . . . ? 
C36 C37 C42 C41 -178.5(13) . . . . ? 
C38 C37 C42 C43 -177.0(12) . . . . ? 
C36 C37 C42 C43 6(2) . . . . ? 
C45 N2 C43 O2 -5.8(16) . . . . ? 
Cu2 N2 C43 O2 175.6(9) . . . . ? 
C45 N2 C43 C42 174.0(13) . . . . ? 
Cu2 N2 C43 C42 -5(2) . . . . ? 
C41 C42 C43 N2 -178.5(13) . . . . ? 
C37 C42 C43 N2 -3(2) . . . . ? 
C41 C42 C43 O2 1.3(18) . . . . ? 
C37 C42 C43 O2 176.9(12) . . . . ? 
N2 C43 O2 C44 -4.9(16) . . . . ? 
C42 C43 O2 C44 175.3(12) . . . . ? 
C45 C44 O2 C43 12.9(16) . . . . ? 
C43 N2 C45 C46 -108.5(14) . . . . ? 
Cu2 N2 C45 C46 70.1(16) . . . . ? 
C43 N2 C45 C44 13.2(15) . . . . ? 
Cu2 N2 C45 C44 -168.2(10) . . . . ? 
O2 C44 C45 N2 -15.4(16) . . . . ? 
O2 C44 C45 C46 105.6(15) . . . . ? 
N2 C45 C46 C47 63.8(18) . . . . ? 
C44 C45 C46 C47 -51.1(19) . . . . ? 
N2 C45 C46 C48 -170.5(14) . . . . ? 
C44 C45 C46 C48 74.5(18) . . . . ? 
C9 Fe1 C1 C2 174.6(13) . . . . ? 
C8 Fe1 C1 C2 70(7) . . . . ? 
C5 Fe1 C1 C2 -120.7(12) . . . . ? 
C10 Fe1 C1 C2 138.0(12) . . . . ? 
C4 Fe1 C1 C2 -81.2(10) . . . . ? 
C7 Fe1 C1 C2 66.6(14) . . . . ? 
C3 Fe1 C1 C2 -39.6(9) . . . . ? 
C6 Fe1 C1 C2 97.5(13) . . . . ? 
C9 Fe1 C1 C5 -64.7(15) . . . . ? 
C2 Fe1 C1 C5 120.7(12) . . . . ? 
C8 Fe1 C1 C5 -169(7) . . . . ? 
C10 Fe1 C1 C5 -101.3(12) . . . . ? 
C4 Fe1 C1 C5 39.5(9) . . . . ? 
C7 Fe1 C1 C5 -172.6(13) . . . . ? 
C3 Fe1 C1 C5 81.2(10) . . . . ? 
C6 Fe1 C1 C5 -141.8(13) . . . . ? 
C9 Fe1 C1 C11 56.6(18) . . . . ? 
C2 Fe1 C1 C11 -117.9(15) . . . . ? 
C8 Fe1 C1 C11 -48(8) . . . . ? 
C5 Fe1 C1 C11 121.3(14) . . . . ? 
C10 Fe1 C1 C11 20.0(16) . . . . ? 
C4 Fe1 C1 C11 160.8(13) . . . . ? 
C7 Fe1 C1 C11 -51.3(17) . . . . ? 
C3 Fe1 C1 C11 -157.5(13) . . . . ? 
C6 Fe1 C1 C11 -20.5(16) . . . . ? 
C2 C1 C5 C4 -2.3(17) . . . . ? 
C11 C1 C5 C4 -175.4(13) . . . . ? 
Fe1 C1 C5 C4 -61.2(11) . . . . ? 
C2 C1 C5 Fe1 59.0(10) . . . . ? 
C11 C1 C5 Fe1 -114.2(14) . . . . ? 
C9 Fe1 C5 C4 -101.2(13) . . . . ? 
C1 Fe1 C5 C4 115.9(13) . . . . ? 
C2 Fe1 C5 C4 79.0(10) . . . . ? 
C8 Fe1 C5 C4 -66.1(16) . . . . ? 
C10 Fe1 C5 C4 -148.2(13) . . . . ? 
C7 Fe1 C5 C4 -174(8) . . . . ? 
C3 Fe1 C5 C4 34.3(9) . . . . ? 
C6 Fe1 C5 C4 177.0(15) . . . . ? 
C9 Fe1 C5 C1 142.9(11) . . . . ? 
C2 Fe1 C5 C1 -36.9(8) . . . . ? 
C8 Fe1 C5 C1 178.0(12) . . . . ? 
C10 Fe1 C5 C1 95.9(12) . . . . ? 
C4 Fe1 C5 C1 -115.9(13) . . . . ? 
C7 Fe1 C5 C1 70(8) . . . . ? 
C3 Fe1 C5 C1 -81.6(9) . . . . ? 
C6 Fe1 C5 C1 61.1(17) . . . . ? 
C1 C5 C4 C3 1.4(19) . . . . ? 
Fe1 C5 C4 C3 -58.9(13) . . . . ? 
C1 C5 C4 Fe1 60.2(10) . . . . ? 
C9 Fe1 C4 C3 -137.5(13) . . . . ? 
C1 Fe1 C4 C3 83.0(10) . . . . ? 
C2 Fe1 C4 C3 38.5(9) . . . . ? 
C8 Fe1 C4 C3 -93.7(13) . . . . ? 
C5 Fe1 C4 C3 122.8(14) . . . . ? 
C10 Fe1 C4 C3 177.8(13) . . . . ? 
C7 Fe1 C4 C3 -58.1(16) . . . . ? 
C6 Fe1 C4 C3 45(32) . . . . ? 
C9 Fe1 C4 C5 99.6(13) . . . . ? 
C1 Fe1 C4 C5 -39.8(9) . . . . ? 
C2 Fe1 C4 C5 -84.3(10) . . . . ? 
C8 Fe1 C4 C5 143.5(13) . . . . ? 
C10 Fe1 C4 C5 54.9(17) . . . . ? 
C7 Fe1 C4 C5 179.1(13) . . . . ? 
C3 Fe1 C4 C5 -122.8(14) . . . . ? 
C6 Fe1 C4 C5 -78(32) . . . . ? 
C5 C4 C3 C2 0(2) . . . . ? 
Fe1 C4 C3 C2 -57.4(11) . . . . ? 
C5 C4 C3 Fe1 57.4(12) . . . . ? 
C9 Fe1 C3 C4 68.1(16) . . . . ? 
C1 Fe1 C3 C4 -80.8(10) . . . . ? 
C2 Fe1 C3 C4 -119.8(13) . . . . ? 
C8 Fe1 C3 C4 105.5(14) . . . . ? 
C5 Fe1 C3 C4 -36.3(10) . . . . ? 
C10 Fe1 C3 C4 -148(16) . . . . ? 
C7 Fe1 C3 C4 146.6(11) . . . . ? 
C6 Fe1 C3 C4 -177.8(15) . . . . ? 
C9 Fe1 C3 C2 -172.1(13) . . . . ? 
C1 Fe1 C3 C2 39.0(8) . . . . ? 
C8 Fe1 C3 C2 -134.7(13) . . . . ? 
C5 Fe1 C3 C2 83.5(9) . . . . ? 
C10 Fe1 C3 C2 -28(17) . . . . ? 
C4 Fe1 C3 C2 119.8(13) . . . . ? 
C7 Fe1 C3 C2 -93.6(10) . . . . ? 
C6 Fe1 C3 C2 -58.0(16) . . . . ? 
C5 C1 C2 C3 2.3(17) . . . . ? 
C11 C1 C2 C3 175.7(13) . . . . ? 
Fe1 C1 C2 C3 61.3(10) . . . . ? 
C5 C1 C2 Fe1 -59.0(10) . . . . ? 
C11 C1 C2 Fe1 114.4(13) . . . . ? 
C4 C3 C2 C1 -1.4(18) . . . . ? 
Fe1 C3 C2 C1 -60.3(10) . . . . ? 
C4 C3 C2 Fe1 58.8(12) . . . . ? 
C9 Fe1 C2 C1 -141(10) . . . . ? 
C8 Fe1 C2 C1 -171.5(14) . . . . ? 
C5 Fe1 C2 C1 37.1(8) . . . . ? 
C10 Fe1 C2 C1 -64.9(14) . . . . ? 
C4 Fe1 C2 C1 81.1(9) . . . . ? 
C7 Fe1 C2 C1 -137.3(11) . . . . ? 
C3 Fe1 C2 C1 116.8(12) . . . . ? 
C6 Fe1 C2 C1 -98.7(13) . . . . ? 
C9 Fe1 C2 C3 102(10) . . . . ? 
C1 Fe1 C2 C3 -116.8(12) . . . . ? 
C8 Fe1 C2 C3 71.6(16) . . . . ? 
C5 Fe1 C2 C3 -79.7(9) . . . . ? 
C10 Fe1 C2 C3 178.3(12) . . . . ? 
C4 Fe1 C2 C3 -35.7(8) . . . . ? 
C7 Fe1 C2 C3 105.9(11) . . . . ? 
C6 Fe1 C2 C3 144.5(12) . . . . ? 
C2 C1 C11 C12 14(5) . . . . ? 
C5 C1 C11 C12 -174(4) . . . . ? 
Fe1 C1 C11 C12 99(4) . . . . ? 
C2 C1 C11 Cu1 -161.0(12) . . . . ? 
C5 C1 C11 Cu1 11(2) . . . . ? 
Fe1 C1 C11 Cu1 -75.7(15) . . . . ? 
N1 Cu1 C11 C12 -2.5(12) . . . . ? 
Br1 Cu1 C11 C12 179.5(8) . . . . ? 
C12 Cu1 C11 C1 178.0(19) . . . . ? 
N1 Cu1 C11 C1 175.5(11) . . . . ? 
Br1 Cu1 C11 C1 -2.4(14) . . . . ? 
C1 C11 C12 C13 1(8) . . . . ? 
Cu1 C11 C12 C13 176(4) . . . . ? 
C1 C11 C12 Cu1 -176(4) . . . . ? 
N1 Cu1 C12 C11 178.1(9) . . . . ? 
Br1 Cu1 C12 C11 -0.9(15) . . . . ? 
N1 Cu1 C12 C13 -0.3(12) . . . . ? 
C11 Cu1 C12 C13 -178.5(18) . . . . ? 
Br1 Cu1 C12 C13 -179.4(7) . . . . ? 
C11 C12 C13 C14 2(5) . . . . ? 
Cu1 C12 C13 C14 177.2(11) . . . . ? 
C11 C12 C13 C18 -175(4) . . . . ? 
Cu1 C12 C13 C18 0.6(19) . . . . ? 
C18 C13 C14 C15 -2(2) . . . . ? 
C12 C13 C14 C15 -178.6(15) . . . . ? 
C13 C14 C15 C16 0(3) . . . . ? 
C14 C15 C16 C17 0(3) . . . . ? 
C15 C16 C17 C18 1(3) . . . . ? 
C16 C17 C18 C13 -2(2) . . . . ? 
C16 C17 C18 C19 -179.3(14) . . . . ? 
C14 C13 C18 C17 3(2) . . . . ? 
C12 C13 C18 C17 179.5(14) . . . . ? 
C14 C13 C18 C19 179.5(13) . . . . ? 
C12 C13 C18 C19 -4(2) . . . . ? 
C21 N1 C19 O1 -2.1(17) . . . . ? 
Cu1 N1 C19 O1 172.9(9) . . . . ? 
C21 N1 C19 C18 176.9(13) . . . . ? 
Cu1 N1 C19 C18 -8(2) . . . . ? 
C20 O1 C19 N1 -6.4(17) . . . . ? 
C20 O1 C19 C18 174.5(12) . . . . ? 
C17 C18 C19 N1 -174.9(16) . . . . ? 
C13 C18 C19 N1 8(2) . . . . ? 
C17 C18 C19 O1 4.0(19) . . . . ? 
C13 C18 C19 O1 -172.9(13) . . . . ? 
C19 O1 C20 C21 11.5(16) . . . . ? 
C19 N1 C21 C22 -114.4(14) . . . . ? 
Cu1 N1 C21 C22 70.6(14) . . . . ? 
C19 N1 C21 C20 8.9(15) . . . . ? 
Cu1 N1 C21 C20 -166.1(10) . . . . ? 
O1 C20 C21 C22 108.5(15) . . . . ? 
O1 C20 C21 N1 -11.8(15) . . . . ? 
N1 C21 C22 C23 57.5(16) . . . . ? 
C20 C21 C22 C23 -56.1(17) . . . . ? 
N1 C21 C22 C24 -179.0(11) . . . . ? 
C20 C21 C22 C24 67.4(17) . . . . ? 
C9 Fe1 C8 C7 -116(2) . . . . ? 
C1 Fe1 C8 C7 -4(8) . . . . ? 
C2 Fe1 C8 C7 59.9(19) . . . . ? 
C5 Fe1 C8 C7 -171.5(15) . . . . ? 
C10 Fe1 C8 C7 -74.1(18) . . . . ? 
C4 Fe1 C8 C7 146.0(15) . . . . ? 
C3 Fe1 C8 C7 103.3(16) . . . . ? 
C6 Fe1 C8 C7 -32.6(17) . . . . ? 
C1 Fe1 C8 C9 112(7) . . . . ? 
C2 Fe1 C8 C9 175.8(14) . . . . ? 
C5 Fe1 C8 C9 -56(2) . . . . ? 
C10 Fe1 C8 C9 41.8(16) . . . . ? 
C4 Fe1 C8 C9 -98.1(16) . . . . ? 
C7 Fe1 C8 C9 116(2) . . . . ? 
C3 Fe1 C8 C9 -140.8(15) . . . . ? 
C6 Fe1 C8 C9 83.4(18) . . . . ? 
C9 Fe1 C10 C6 114(2) . . . . ? 
C1 Fe1 C10 C6 -97.7(16) . . . . ? 
C2 Fe1 C10 C6 -58.3(18) . . . . ? 
C8 Fe1 C10 C6 76.1(18) . . . . ? 
C5 Fe1 C10 C6 -142.1(15) . . . . ? 
C4 Fe1 C10 C6 -177.6(15) . . . . ? 
C7 Fe1 C10 C6 35.2(14) . . . . ? 
C3 Fe1 C10 C6 -32(17) . . . . ? 
C1 Fe1 C10 C9 148.1(13) . . . . ? 
C2 Fe1 C10 C9 -172.5(13) . . . . ? 
C8 Fe1 C10 C9 -38.0(14) . . . . ? 
C5 Fe1 C10 C9 103.7(13) . . . . ? 
C4 Fe1 C10 C9 68.2(17) . . . . ? 
C7 Fe1 C10 C9 -79.0(13) . . . . ? 
C3 Fe1 C10 C9 -146(16) . . . . ? 
C6 Fe1 C10 C9 -114(2) . . . . ? 
C9 C8 C7 C6 -2(3) . . . . ? 
Fe1 C8 C7 C6 59.8(19) . . . . ? 
C9 C8 C7 Fe1 -61.5(15) . . . . ? 
C9 Fe1 C7 C6 -85.4(19) . . . . ? 
C1 Fe1 C7 C6 55(2) . . . . ? 
C2 Fe1 C7 C6 95.0(18) . . . . ? 
C8 Fe1 C7 C6 -125(3) . . . . ? 
C5 Fe1 C7 C6 -10(9) . . . . ? 
C10 Fe1 C7 C6 -37.0(16) . . . . ? 
C4 Fe1 C7 C6 176.7(17) . . . . ? 
C3 Fe1 C7 C6 140.5(18) . . . . ? 
C9 Fe1 C7 C8 39.4(14) . . . . ? 
C1 Fe1 C7 C8 179.4(12) . . . . ? 
C2 Fe1 C7 C8 -140.2(14) . . . . ? 
C5 Fe1 C7 C8 115(8) . . . . ? 
C10 Fe1 C7 C8 87.8(16) . . . . ? 
C4 Fe1 C7 C8 -59(2) . . . . ? 
C3 Fe1 C7 C8 -94.7(15) . . . . ? 
C6 Fe1 C7 C8 125(3) . . . . ? 
C7 C8 C9 C10 2(2) . . . . ? 
Fe1 C8 C9 C10 -61.6(12) . . . . ? 
C7 C8 C9 Fe1 63.4(16) . . . . ? 
C6 C10 C9 C8 -1(2) . . . . ? 
Fe1 C10 C9 C8 62.9(14) . . . . ? 
C6 C10 C9 Fe1 -64.1(15) . . . . ? 
C1 Fe1 C9 C8 -170.5(16) . . . . ? 
C2 Fe1 C9 C8 -33(11) . . . . ? 
C5 Fe1 C9 C8 148.2(16) . . . . ? 
C10 Fe1 C9 C8 -115(2) . . . . ? 
C4 Fe1 C9 C8 102.6(17) . . . . ? 
C7 Fe1 C9 C8 -37.6(16) . . . . ? 
C3 Fe1 C9 C8 63(2) . . . . ? 
C6 Fe1 C9 C8 -78(2) . . . . ? 
C1 Fe1 C9 C10 -55.1(19) . . . . ? 
C2 Fe1 C9 C10 82(10) . . . . ? 
C8 Fe1 C9 C10 115(2) . . . . ? 
C5 Fe1 C9 C10 -96.5(14) . . . . ? 
C4 Fe1 C9 C10 -142.1(14) . . . . ? 
C7 Fe1 C9 C10 77.8(16) . . . . ? 
C3 Fe1 C9 C10 177.9(13) . . . . ? 
C6 Fe1 C9 C10 37.8(13) . . . . ? 
C8 C7 C6 C10 1(3) . . . . ? 
Fe1 C7 C6 C10 59.4(17) . . . . ? 
C8 C7 C6 Fe1 -58.4(18) . . . . ? 
C9 C10 C6 C7 0(2) . . . . ? 
Fe1 C10 C6 C7 -60.3(17) . . . . ? 
C9 C10 C6 Fe1 60.5(12) . . . . ? 
C9 Fe1 C6 C7 76.7(16) . . . . ? 
C1 Fe1 C6 C7 -143.3(14) . . . . ? 
C2 Fe1 C6 C7 -99.4(16) . . . . ? 
C8 Fe1 C6 C7 33.6(15) . . . . ? 
C5 Fe1 C6 C7 178.6(13) . . . . ? 
C10 Fe1 C6 C7 120(2) . . . . ? 
C4 Fe1 C6 C7 -106(31) . . . . ? 
C3 Fe1 C6 C7 -62(2) . . . . ? 
C9 Fe1 C6 C10 -42.8(14) . . . . ? 
C1 Fe1 C6 C10 97.2(15) . . . . ? 
C2 Fe1 C6 C10 141.1(14) . . . . ? 
C8 Fe1 C6 C10 -86.0(16) . . . . ? 
C5 Fe1 C6 C10 59(2) . . . . ? 
C4 Fe1 C6 C10 134(31) . . . . ? 
C7 Fe1 C6 C10 -120(2) . . . . ? 
C3 Fe1 C6 C10 178.0(13) . . . . ? 
  
_diffrn_measured_fraction_theta_max    0.984 
_diffrn_reflns_theta_full              25.00 
_diffrn_measured_fraction_theta_full   0.984 
_refine_diff_density_max    0.891 
_refine_diff_density_min   -0.431 
_refine_diff_density_rms    0.104 
#===END

##Crystallographic data of 4c

  
data_4c 
  
_audit_creation_method            SHELXL-97 
_chemical_name_systematic 
; 
 ? 
; 
_chemical_name_common             ? 
_chemical_melting_point           ? 
_chemical_formula_moiety          
 'C27 H21 Cu Fe I N O'
_chemical_formula_sum 
 'C27 H21 Cu Fe I N O' 
_chemical_formula_weight          621.75 
  
loop_ 
 _atom_type_symbol 
 _atom_type_description 
 _atom_type_scat_dispersion_real 
 _atom_type_scat_dispersion_imag 
 _atom_type_scat_source 
 'C'  'C'   0.0033   0.0016 
 'International Tables Vol C Tables 4.2.6.8 and 6.1.1.4' 
 'H'  'H'   0.0000   0.0000 
 'International Tables Vol C Tables 4.2.6.8 and 6.1.1.4' 
 'N'  'N'   0.0061   0.0033 
 'International Tables Vol C Tables 4.2.6.8 and 6.1.1.4' 
 'O'  'O'   0.0106   0.0060 
 'International Tables Vol C Tables 4.2.6.8 and 6.1.1.4' 
 'Fe'  'Fe'   0.3463   0.8444 
 'International Tables Vol C Tables 4.2.6.8 and 6.1.1.4' 
 'Cu'  'Cu'   0.3201   1.2651 
 'International Tables Vol C Tables 4.2.6.8 and 6.1.1.4' 
 'Br'  'Br'  -0.2901   2.4595 
 'International Tables Vol C Tables 4.2.6.8 and 6.1.1.4' 
 'I'  'I'  -0.4742   1.8119 
 'International Tables Vol C Tables 4.2.6.8 and 6.1.1.4' 
  
_symmetry_cell_setting            Orthorhombic 
_symmetry_space_group_name_H-M    P212121 
_symmetry_space_group_name_Hall   P2ac2ab 
  
loop_ 
 _symmetry_equiv_pos_as_xyz 
 'x, y, z' 
 '-x+1/2, -y, z+1/2' 
 '-x, y+1/2, -z+1/2' 
 'x+1/2, -y+1/2, -z' 
  
_cell_length_a                    9.5006(12) 
_cell_length_b                    13.0647(16) 
_cell_length_c                    19.113(2) 
_cell_angle_alpha                 90.00 
_cell_angle_beta                  90.00 
_cell_angle_gamma                 90.00 
_cell_volume                      2372.4(5) 
_cell_formula_units_Z             4 
_cell_measurement_temperature     298(2) 
_cell_measurement_reflns_used     4174 
_cell_measurement_theta_min       2.39 
_cell_measurement_theta_max       17.92 
  
_exptl_crystal_description        block 
_exptl_crystal_colour             red 
_exptl_crystal_size_max           0.204 
_exptl_crystal_size_mid           0.186 
_exptl_crystal_size_min           0.122 
_exptl_crystal_density_meas       ? 
_exptl_crystal_density_diffrn     1.741 
_exptl_crystal_density_method     'not measured' 
_exptl_crystal_F_000              1224.0 
_exptl_absorpt_coefficient_mu     2.828 
_exptl_absorpt_correction_type    multi-scan 
_exptl_absorpt_correction_T_min   0.567 
_exptl_absorpt_correction_T_max   0.708 
_exptl_absorpt_process_details    '(SADABS; Bruker, 2000)' 
  
_exptl_special_details 
; 
 ? 
; 
  
_diffrn_ambient_temperature       298(2) 
_diffrn_radiation_wavelength      0.71073 
_diffrn_radiation_type            MoK\a 
_diffrn_radiation_source          'fine-focus sealed tube' 
_diffrn_radiation_monochromator   graphite 
_diffrn_measurement_device_type   'CCD area detector' 
_diffrn_measurement_method        'phi and omega scans' 
_diffrn_detector_area_resol_mean  ? 
_diffrn_standards_number          ? 
_diffrn_standards_interval_count  ? 
_diffrn_standards_interval_time   ? 
_diffrn_standards_decay_%         ? 
_diffrn_reflns_number             23083 
_diffrn_reflns_av_R_equivalents   0.0635 
_diffrn_reflns_av_sigmaI/netI     0.0478 
_diffrn_reflns_limit_h_min        -11 
_diffrn_reflns_limit_h_max        11 
_diffrn_reflns_limit_k_min        -15 
_diffrn_reflns_limit_k_max        15 
_diffrn_reflns_limit_l_min        -22 
_diffrn_reflns_limit_l_max        22 
_diffrn_reflns_theta_min          2.13 
_diffrn_reflns_theta_max          24.99 
_reflns_number_total              4173 
_reflns_number_gt                 3742 
_reflns_threshold_expression      >2sigma(I) 
  
_computing_data_collection        'Bruker SMART' 
_computing_cell_refinement        'Bruker SMART' 
_computing_data_reduction         'Bruker SAINT' 
_computing_structure_solution     'SHELXS-97 (Sheldrick, 1990)' 
_computing_structure_refinement   'SHELXL-97 (Sheldrick, 1997)' 
_computing_molecular_graphics     'Bruker SHELXTL' 
_computing_publication_material   'Bruker SHELXTL' 
  
_refine_special_details 
; 
 Refinement of F^2^ against ALL reflections.  The weighted R-factor wR and 
 goodness of fit S are based on F^2^, conventional R-factors R are based 
 on F, with F set to zero for negative F^2^. The threshold expression of 
 F^2^ > 2sigma(F^2^) is used only for calculating R-factors(gt) etc. and is 
 not relevant to the choice of reflections for refinement.  R-factors based 
 on F^2^ are statistically about twice as large as those based on F, and R- 
 factors based on ALL data will be even larger. 
; 
  
_refine_ls_structure_factor_coef  Fsqd 
_refine_ls_matrix_type            full 
_refine_ls_weighting_scheme       calc 
_refine_ls_weighting_details 
 'calc w=1/[\s^2^(Fo^2^)+(0.0498P)^2^+0.2390P] where P=(Fo^2^+2Fc^2^)/3' 
_atom_sites_solution_primary      direct 
_atom_sites_solution_secondary    difmap 
_atom_sites_solution_hydrogens    geom 
_refine_ls_hydrogen_treatment     mixed 
_refine_ls_extinction_method      none 
_chemical_absolute_configuration syn
_refine_ls_extinction_coef        ? 
_refine_ls_abs_structure_details 
 'Flack H D (1983), Acta Cryst. A39, 876-881' 
_refine_ls_abs_structure_Flack    0.03(4) 
_refine_ls_number_reflns          4173 
_refine_ls_number_parameters      289 
_refine_ls_number_restraints      0 
_refine_ls_R_factor_all           0.0637 
_refine_ls_R_factor_gt            0.0554 
_refine_ls_wR_factor_ref          0.1125 
_refine_ls_wR_factor_gt           0.1094 
_refine_ls_goodness_of_fit_ref    1.198 
_refine_ls_restrained_S_all       1.198 
_refine_ls_shift/su_max           0.002 
_refine_ls_shift/su_mean          0.000 
  
loop_ 
 _atom_site_label 
 _atom_site_type_symbol 
 _atom_site_fract_x 
 _atom_site_fract_y 
 _atom_site_fract_z 
 _atom_site_U_iso_or_equiv 
 _atom_site_adp_type 
 _atom_site_occupancy 
 _atom_site_symmetry_multiplicity 
 _atom_site_calc_flag 
 _atom_site_refinement_flags 
 _atom_site_disorder_assembly 
 _atom_site_disorder_group 
I1 I 0.71974(6) 0.96197(5) 0.53962(3) 0.0634(2) Uani 1 1 d . . . 
Cu1 Cu 0.68539(9) 0.89140(7) 0.66004(5) 0.0428(2) Uani 1 1 d . . . 
O1 O 0.3997(6) 0.6689(4) 0.7104(3) 0.0559(15) Uani 1 1 d . . . 
N1 N 0.5611(6) 0.7727(4) 0.6637(3) 0.0416(15) Uani 1 1 d . . . 
Fe1 Fe 1.09635(12) 1.01801(9) 0.70632(7) 0.0544(3) Uani 1 1 d . . . 
C1 C 0.8942(8) 1.0451(6) 0.7327(5) 0.055(2) Uani 1 1 d . . . 
C2 C 0.9863(8) 1.0680(7) 0.7904(5) 0.064(2) Uani 1 1 d . . . 
H2 H 0.9841 1.0367 0.8370 0.076 Uiso 1 1 calc R . . 
C3 C 1.0799(10) 1.1453(7) 0.7670(6) 0.069(3) Uani 1 1 d . . . 
H3 H 1.1561 1.1756 0.7947 0.082 Uiso 1 1 calc R . . 
C4 C 1.0494(10) 1.1684(7) 0.6991(7) 0.077(3) Uani 1 1 d . . . 
H4 H 1.0998 1.2184 0.6703 0.093 Uiso 1 1 calc R . . 
C5 C 0.9332(9) 1.1073(7) 0.6765(6) 0.071(3) Uani 1 1 d . . . 
H5 H 0.8891 1.1087 0.6302 0.085 Uiso 1 1 calc R . . 
C6 C 1.1118(14) 0.8705(9) 0.6767(10) 0.114(6) Uani 1 1 d . . . 
H6 H 1.0335 0.8217 0.6754 0.137 Uiso 1 1 calc R . . 
C7 C 1.1500(14) 0.9333(10) 0.6231(7) 0.109(5) Uani 1 1 d . . . 
H7 H 1.1060 0.9360 0.5768 0.131 Uiso 1 1 calc R . . 
C8 C 1.2668(12) 0.9893(10) 0.6447(7) 0.102(4) Uani 1 1 d . . . 
H8 H 1.3163 1.0403 0.6163 0.123 Uiso 1 1 calc R . . 
C9 C 1.2984(11) 0.9651(10) 0.7139(8) 0.101(4) Uani 1 1 d . . . 
H9 H 1.3745 0.9934 0.7426 0.121 Uiso 1 1 calc R . . 
C10 C 1.1980(15) 0.8876(11) 0.7339(8) 0.111(4) Uani 1 1 d . . . 
H10 H 1.1926 0.8529 0.7793 0.133 Uiso 1 1 calc R . . 
C11 C 0.7886(8) 0.9653(6) 0.7363(4) 0.0482(18) Uani 1 1 d . . . 
C12 C 0.7131(8) 0.8982(6) 0.7609(4) 0.0426(17) Uani 1 1 d . . . 
C13 C 0.6418(8) 0.8345(6) 0.8105(4) 0.0405(18) Uani 1 1 d . . . 
C14 C 0.6765(9) 0.8469(6) 0.8824(4) 0.054(2) Uani 1 1 d . . . 
H14 H 0.7449 0.8941 0.8954 0.065 Uiso 1 1 calc R . . 
C15 C 0.6098(11) 0.7896(7) 0.9329(5) 0.065(3) Uani 1 1 d . . . 
H15 H 0.6337 0.7971 0.9798 0.078 Uiso 1 1 calc R . . 
C16 C 0.5088(11) 0.7220(7) 0.9134(5) 0.063(3) Uani 1 1 d . . . 
H16 H 0.4618 0.6853 0.9480 0.075 Uiso 1 1 calc R . . 
C17 C 0.4730(9) 0.7056(6) 0.8449(5) 0.054(2) Uani 1 1 d . . . 
H17 H 0.4047 0.6574 0.8336 0.064 Uiso 1 1 calc R . . 
C18 C 0.5397(8) 0.7618(5) 0.7916(4) 0.0400(17) Uani 1 1 d . . . 
C19 C 0.5028(7) 0.7386(5) 0.7194(4) 0.0369(17) Uani 1 1 d . . . 
C20 C 0.3687(9) 0.6708(7) 0.6373(5) 0.058(2) Uani 1 1 d . . . 
H20A H 0.2905 0.7162 0.6274 0.069 Uiso 1 1 calc R . . 
H20B H 0.3463 0.6028 0.6202 0.069 Uiso 1 1 calc R . . 
C21 C 0.5054(9) 0.7108(6) 0.6045(4) 0.050(2) Uani 1 1 d . . . 
H21 H 0.4839 0.7553 0.5646 0.060 Uiso 1 1 calc R . . 
C22 C 0.6143(8) 0.6320(6) 0.5839(4) 0.0411(18) Uani 1 1 d . . . 
C23 C 0.7384(11) 0.6615(7) 0.5540(5) 0.078(3) Uani 1 1 d . . . 
H23 H 0.7536 0.7306 0.5450 0.093 Uiso 1 1 calc R . . 
C24 C 0.8403(12) 0.5929(8) 0.5372(6) 0.082(3) Uani 1 1 d . . . 
H24 H 0.9235 0.6165 0.5174 0.098 Uiso 1 1 calc R . . 
C25 C 0.8247(12) 0.4939(8) 0.5482(5) 0.075(3) Uani 1 1 d . . . 
H25 H 0.8930 0.4474 0.5340 0.090 Uiso 1 1 calc R . . 
C26 C 0.7044(14) 0.4619(9) 0.5814(8) 0.119(5) Uani 1 1 d . . . 
H26 H 0.6930 0.3930 0.5922 0.143 Uiso 1 1 calc R . . 
C27 C 0.6014(12) 0.5300(8) 0.5988(7) 0.100(4) Uani 1 1 d . . . 
H27 H 0.5208 0.5066 0.6213 0.120 Uiso 1 1 calc R . . 
  
loop_ 
 _atom_site_aniso_label 
 _atom_site_aniso_U_11 
 _atom_site_aniso_U_22 
 _atom_site_aniso_U_33 
 _atom_site_aniso_U_23 
 _atom_site_aniso_U_13 
 _atom_site_aniso_U_12 
I1 0.0717(4) 0.0646(4) 0.0539(3) 0.0110(3) 0.0008(3) -0.0168(3) 
Cu1 0.0410(5) 0.0412(5) 0.0461(5) -0.0017(4) 0.0002(4) -0.0062(4) 
O1 0.051(3) 0.060(4) 0.057(4) -0.001(3) 0.008(3) -0.019(3) 
N1 0.037(3) 0.039(4) 0.049(4) -0.006(3) 0.003(3) -0.003(3) 
Fe1 0.0462(6) 0.0471(7) 0.0699(8) -0.0080(6) 0.0070(6) -0.0090(5) 
C1 0.045(4) 0.037(4) 0.082(6) -0.004(4) -0.013(4) -0.010(4) 
C2 0.049(5) 0.068(6) 0.073(6) -0.037(5) -0.003(5) 0.004(4) 
C3 0.047(5) 0.059(6) 0.100(8) -0.029(5) -0.009(5) -0.008(4) 
C4 0.056(6) 0.047(5) 0.129(10) -0.003(6) -0.009(6) -0.012(4) 
C5 0.058(5) 0.047(5) 0.109(8) 0.005(5) -0.016(5) -0.021(4) 
C6 0.086(9) 0.053(7) 0.202(16) -0.040(9) 0.079(11) -0.010(6) 
C7 0.103(9) 0.111(10) 0.114(9) -0.061(8) 0.048(8) -0.038(8) 
C8 0.088(8) 0.107(9) 0.113(10) -0.026(8) 0.050(8) -0.035(7) 
C9 0.059(6) 0.095(8) 0.148(12) -0.010(9) 0.027(7) 0.022(7) 
C10 0.080(9) 0.101(10) 0.150(13) 0.024(9) 0.028(9) 0.038(8) 
C11 0.043(4) 0.048(4) 0.054(4) -0.015(4) -0.012(4) 0.005(4) 
C12 0.038(4) 0.040(4) 0.050(4) -0.010(3) -0.002(4) 0.001(4) 
C13 0.042(4) 0.041(4) 0.038(4) 0.001(3) -0.001(3) 0.013(3) 
C14 0.053(5) 0.051(5) 0.058(5) -0.015(4) 0.007(4) 0.008(4) 
C15 0.090(7) 0.061(6) 0.044(5) 0.001(4) 0.004(5) 0.018(6) 
C16 0.078(7) 0.054(6) 0.056(6) 0.013(5) 0.013(5) 0.012(5) 
C17 0.069(5) 0.040(5) 0.053(5) 0.008(4) 0.020(5) -0.001(4) 
C18 0.044(4) 0.032(4) 0.044(4) -0.010(4) 0.005(4) 0.008(3) 
C19 0.025(3) 0.036(4) 0.050(5) -0.013(4) 0.009(3) 0.002(3) 
C20 0.044(5) 0.056(5) 0.073(6) -0.009(5) 0.003(4) -0.012(4) 
C21 0.059(5) 0.046(5) 0.046(5) -0.002(4) -0.004(4) -0.001(4) 
C22 0.045(4) 0.046(5) 0.032(4) -0.004(3) 0.005(3) -0.010(4) 
C23 0.091(7) 0.051(5) 0.092(7) 0.017(5) 0.039(6) 0.011(5) 
C24 0.084(7) 0.069(7) 0.092(8) 0.009(6) 0.035(6) 0.011(6) 
C25 0.079(7) 0.077(8) 0.068(6) -0.016(5) 0.005(6) 0.014(6) 
C26 0.107(10) 0.045(6) 0.206(14) -0.014(8) 0.002(10) 0.001(8) 
C27 0.084(7) 0.042(6) 0.175(12) -0.011(7) 0.029(8) -0.018(6) 
  
_geom_special_details 
; 
 All esds (except the esd in the dihedral angle between two l.s. planes) 
 are estimated using the full covariance matrix.  The cell esds are taken 
 into account individually in the estimation of esds in distances, angles 
 and torsion angles; correlations between esds in cell parameters are only 
 used when they are defined by crystal symmetry.  An approximate (isotropic) 
 treatment of cell esds is used for estimating esds involving l.s. planes. 
; 
  
loop_ 
 _geom_bond_atom_site_label_1 
 _geom_bond_atom_site_label_2 
 _geom_bond_distance 
 _geom_bond_site_symmetry_2 
 _geom_bond_publ_flag 
I1 Cu1 2.5008(11) . ? 
Cu1 C12 1.947(7) . ? 
Cu1 N1 1.951(6) . ? 
Cu1 C11 2.004(7) . ? 
O1 C19 1.348(8) . ? 
O1 C20 1.428(10) . ? 
N1 C19 1.280(9) . ? 
N1 C21 1.488(10) . ? 
Fe1 C7 2.003(11) . ? 
Fe1 C6 2.014(11) . ? 
Fe1 C1 2.017(8) . ? 
Fe1 C4 2.019(9) . ? 
Fe1 C5 2.022(10) . ? 
Fe1 C2 2.026(9) . ? 
Fe1 C10 2.028(12) . ? 
Fe1 C3 2.033(9) . ? 
Fe1 C8 2.037(10) . ? 
Fe1 C9 2.045(11) . ? 
C1 C5 1.396(13) . ? 
C1 C2 1.440(11) . ? 
C1 C11 1.449(11) . ? 
C2 C3 1.418(13) . ? 
C3 C4 1.363(15) . ? 
C4 C5 1.429(12) . ? 
C6 C7 1.361(18) . ? 
C6 C10 1.384(19) . ? 
C7 C8 1.392(15) . ? 
C8 C9 1.392(17) . ? 
C9 C10 1.443(17) . ? 
C11 C12 1.226(10) . ? 
C12 C13 1.433(10) . ? 
C13 C18 1.405(10) . ? 
C13 C14 1.421(10) . ? 
C14 C15 1.376(12) . ? 
C15 C16 1.356(13) . ? 
C16 C17 1.370(12) . ? 
C17 C18 1.407(11) . ? 
C18 C19 1.455(10) . ? 
C20 C21 1.535(11) . ? 
C21 C22 1.512(11) . ? 
C22 C23 1.365(12) . ? 
C22 C27 1.369(12) . ? 
C23 C24 1.357(13) . ? 
C24 C25 1.319(14) . ? 
C25 C26 1.373(16) . ? 
C26 C27 1.363(15) . ? 
  
loop_ 
 _geom_angle_atom_site_label_1 
 _geom_angle_atom_site_label_2 
 _geom_angle_atom_site_label_3 
 _geom_angle 
 _geom_angle_site_symmetry_1 
 _geom_angle_site_symmetry_3 
 _geom_angle_publ_flag 
C12 Cu1 N1 94.7(3) . . ? 
C12 Cu1 C11 36.1(3) . . ? 
N1 Cu1 C11 130.8(3) . . ? 
C12 Cu1 I1 151.2(2) . . ? 
N1 Cu1 I1 113.90(19) . . ? 
C11 Cu1 I1 115.3(2) . . ? 
C19 O1 C20 105.3(6) . . ? 
C19 N1 C21 106.9(6) . . ? 
C19 N1 Cu1 124.6(5) . . ? 
C21 N1 Cu1 128.3(5) . . ? 
C7 Fe1 C6 39.6(5) . . ? 
C7 Fe1 C1 122.5(5) . . ? 
C6 Fe1 C1 107.9(4) . . ? 
C7 Fe1 C4 122.7(6) . . ? 
C6 Fe1 C4 158.1(7) . . ? 
C1 Fe1 C4 68.7(4) . . ? 
C7 Fe1 C5 106.9(6) . . ? 
C6 Fe1 C5 121.9(6) . . ? 
C1 Fe1 C5 40.4(4) . . ? 
C4 Fe1 C5 41.4(4) . . ? 
C7 Fe1 C2 159.9(4) . . ? 
C6 Fe1 C2 124.7(5) . . ? 
C1 Fe1 C2 41.7(3) . . ? 
C4 Fe1 C2 68.1(4) . . ? 
C5 Fe1 C2 69.0(4) . . ? 
C7 Fe1 C10 67.7(6) . . ? 
C6 Fe1 C10 40.0(5) . . ? 
C1 Fe1 C10 122.4(5) . . ? 
C4 Fe1 C10 160.1(6) . . ? 
C5 Fe1 C10 157.4(6) . . ? 
C2 Fe1 C10 108.1(5) . . ? 
C7 Fe1 C3 157.6(5) . . ? 
C6 Fe1 C3 161.5(6) . . ? 
C1 Fe1 C3 68.9(3) . . ? 
C4 Fe1 C3 39.3(4) . . ? 
C5 Fe1 C3 68.3(4) . . ? 
C2 Fe1 C3 40.9(4) . . ? 
C10 Fe1 C3 125.1(6) . . ? 
C7 Fe1 C8 40.3(5) . . ? 
C6 Fe1 C8 66.6(5) . . ? 
C1 Fe1 C8 159.0(5) . . ? 
C4 Fe1 C8 108.4(5) . . ? 
C5 Fe1 C8 123.6(6) . . ? 
C2 Fe1 C8 158.2(5) . . ? 
C10 Fe1 C8 67.5(6) . . ? 
C3 Fe1 C8 122.8(4) . . ? 
C7 Fe1 C9 68.3(6) . . ? 
C6 Fe1 C9 68.2(5) . . ? 
C1 Fe1 C9 159.3(5) . . ? 
C4 Fe1 C9 122.7(5) . . ? 
C5 Fe1 C9 159.1(5) . . ? 
C2 Fe1 C9 122.5(5) . . ? 
C10 Fe1 C9 41.5(5) . . ? 
C3 Fe1 C9 108.0(5) . . ? 
C8 Fe1 C9 39.9(5) . . ? 
C5 C1 C2 107.9(7) . . ? 
C5 C1 C11 129.7(7) . . ? 
C2 C1 C11 122.3(8) . . ? 
C5 C1 Fe1 70.0(5) . . ? 
C2 C1 Fe1 69.5(4) . . ? 
C11 C1 Fe1 123.1(5) . . ? 
C3 C2 C1 106.7(9) . . ? 
C3 C2 Fe1 69.8(5) . . ? 
C1 C2 Fe1 68.8(5) . . ? 
C4 C3 C2 109.0(8) . . ? 
C4 C3 Fe1 69.8(6) . . ? 
C2 C3 Fe1 69.3(5) . . ? 
C3 C4 C5 109.1(10) . . ? 
C3 C4 Fe1 70.9(6) . . ? 
C5 C4 Fe1 69.4(5) . . ? 
C1 C5 C4 107.3(9) . . ? 
C1 C5 Fe1 69.6(5) . . ? 
C4 C5 Fe1 69.2(5) . . ? 
C7 C6 C10 109.8(12) . . ? 
C7 C6 Fe1 69.8(7) . . ? 
C10 C6 Fe1 70.5(7) . . ? 
C6 C7 C8 107.9(14) . . ? 
C6 C7 Fe1 70.6(7) . . ? 
C8 C7 Fe1 71.2(6) . . ? 
C7 C8 C9 109.5(12) . . ? 
C7 C8 Fe1 68.6(6) . . ? 
C9 C8 Fe1 70.4(6) . . ? 
C8 C9 C10 105.6(12) . . ? 
C8 C9 Fe1 69.8(7) . . ? 
C10 C9 Fe1 68.6(6) . . ? 
C6 C10 C9 107.2(13) . . ? 
C6 C10 Fe1 69.4(7) . . ? 
C9 C10 Fe1 69.9(7) . . ? 
C12 C11 C1 159.7(8) . . ? 
C12 C11 Cu1 69.4(5) . . ? 
C1 C11 Cu1 130.6(6) . . ? 
C11 C12 C13 161.0(7) . . ? 
C11 C12 Cu1 74.5(5) . . ? 
C13 C12 Cu1 124.4(5) . . ? 
C18 C13 C14 119.1(7) . . ? 
C18 C13 C12 123.2(7) . . ? 
C14 C13 C12 117.7(7) . . ? 
C15 C14 C13 120.6(8) . . ? 
C16 C15 C14 119.2(9) . . ? 
C15 C16 C17 122.6(9) . . ? 
C16 C17 C18 120.0(9) . . ? 
C13 C18 C17 118.5(7) . . ? 
C13 C18 C19 123.5(7) . . ? 
C17 C18 C19 118.0(7) . . ? 
N1 C19 O1 116.3(6) . . ? 
N1 C19 C18 127.7(6) . . ? 
O1 C19 C18 115.9(6) . . ? 
O1 C20 C21 103.4(6) . . ? 
N1 C21 C22 109.0(6) . . ? 
N1 C21 C20 100.1(6) . . ? 
C22 C21 C20 116.9(7) . . ? 
C23 C22 C27 116.0(8) . . ? 
C23 C22 C21 120.5(7) . . ? 
C27 C22 C21 123.2(8) . . ? 
C24 C23 C22 121.9(9) . . ? 
C25 C24 C23 122.0(10) . . ? 
C24 C25 C26 117.7(11) . . ? 
C27 C26 C25 120.8(11) . . ? 
C26 C27 C22 121.3(10) . . ? 
  
_diffrn_measured_fraction_theta_max    0.999 
_diffrn_reflns_theta_full              24.99 
_diffrn_measured_fraction_theta_full   0.999 
_refine_diff_density_max    0.678 
_refine_diff_density_min   -0.433 
_refine_diff_density_rms    0.097 
#===END 
